1 Neuronal adaptation reveals a suboptimal decoding of orientation tuned populations in the  
2 mouse visual cortex

3

4 **Authors:** Miaomiao Jin, Jeffrey M. Beck and Lindsey L. Glickfeld

5

6 **Affiliation:** Department of Neurobiology, Duke University Medical Center, Durham, North  
7 Carolina 27710

8

9 Corresponding Author:  
10 Lindsey Glickfeld  
11 Department of Neurobiology  
12 Duke Medical School  
13 311 Research Drive, BRB-401F  
14 Durham, NC 27710  
15 email: [glickfeld@neuro.duke.edu](mailto:glickfeld@neuro.duke.edu)

16

17 **Number of Pages:** 49

18

19 **Number of Figures:** 7 main and 3 supplementary

20

21 **Number of words:** Abstract (150), Introduction (725), Results (3405), Discussion (1211)

22

23 **Keywords:** perception, decision-making, behavior, calcium imaging

24

25 **Abstract**

26

27 Sensory information is encoded by populations of cortical neurons. Yet, it is unknown how this  
28 information is used for even simple perceptual choices such as discriminating orientation. To  
29 determine the computation underlying this perceptual choice, we took advantage of the robust  
30 adaptation in the mouse visual system. We find that adaptation increases animals' thresholds  
31 for orientation discrimination. This was unexpected since optimal computations that take  
32 advantage of all available sensory information predict that the shift in tuning and increase in  
33 signal-to-noise ratio in the adapted condition should improve discrimination. Instead, we find  
34 that the effects of adaptation on behavior can be explained by the appropriate reliance of the  
35 perceptual choice circuits on target preferring neurons, but the failure to discount neurons that  
36 prefer the distractor. This suggests that to solve this task the circuit has adopted a suboptimal  
37 strategy that discards important task-related information to implement a feed-forward visual  
38 computation.

## 39 **Introduction**

40

41 Sensory processing supports the transformation of signals from the outside world into a neural  
42 code represented by the spiking activity of cortical neurons (Hubel and Wiesel, 1959; Dubner  
43 and Zeki, 1971; Desimone et al., 1984). Decades of causal and correlative studies suggest that  
44 these representations are the basis for perceptual choice (Salzman et al., 1990; Schiller, 1993;  
45 Britten et al., 1996; Hung et al., 2005). However, it is still not understood how these sensory  
46 representations are actually combined, and what information is used, to compute a perceptual  
47 choice.

48

49 Here we focus on understanding how decision-making circuits compute perceptual choices  
50 about the orientation of a visual stimulus. This is a quintessential computation that relies on the  
51 representations encoded in the primary visual cortex (V1) (Glickfeld et al., 2013; Petruno et al.,  
52 2013; Poort et al., 2015; Resulaj et al., 2018). Perhaps the most well-established model for how  
53 such a choice is made requires that it is implemented by a neural circuit capable of monitoring  
54 the entirety of a heterogeneously tuned cortical population to estimate absolute stimulus values  
55 (Georgopoulos et al., 1986; Pouget et al., 2003; Jazayeri and Movshon, 2006; Ma et al., 2006;  
56 Graf et al., 2011). This orientation identification strategy is attractive in that, once it is learned,  
57 the same computation can be used to generalize across multiple tasks (i.e. detection and  
58 discrimination). However, this computation likely requires complex circuits (with knowledge of  
59 the full tuning curve of each neuron) and learning rules to act upon the combined output of a  
60 diversely tuned population (Deneve et al., 1999).

61

62 Instead, when faced with perceptual choices, human and animal subjects often implement task-  
63 specific strategies that require less complex circuits and learning rules (Zhang et al., 2010;  
64 Fulvio et al., 2014; Yu et al., 2017; Djurdjevic et al., 2018). Such a task-specific computation

65 might directly evaluate the identity or level of activity within distinct neuronal ensembles,  
66 agnostic to the tuning of neurons in those ensembles, as in a linear classifier. By removing the  
67 need for an absolute stimulus estimate, the circuits that compute perceptual choice may operate  
68 faster and be more amenable to simple cellular associative learning rules.

69

70 Our goal is to understand how these computational approaches are realized by biological  
71 circuits, and how sensory information is integrated by these circuits to make perceptual  
72 decisions. Stimulus-specific adaptation is a useful tool for evaluating how sensory information is  
73 used to guide perceptual choice since it has predictable effects on neuronal activity and sensory  
74 encoding (Müller et al., 1999; Dragoi et al., 2000). By sparsifying and increasing the signal-to-  
75 noise of neuronal population responses, stimulus-specific adaptation is expected to increase the  
76 information about the presented orientation (Ulanovsky et al., 2003; Wark et al., 2007). In  
77 addition, if the stimulus orientation is estimated, adaptation to the distractor is also expected to  
78 improve orientation discrimination thresholds by decreasing the contribution of the distractor-  
79 preferring neurons (Müller et al., 1999; Dragoi et al., 2000; Kohn and Movshon, 2004; Stocker  
80 and Simoncelli, 2006). Indeed, common perceptual illusions such as the tilt after-effect and the  
81 waterfall illusion are consistent with such repulsive effects of adaptation on tuned populations  
82 (Levinson and Sekuler, 1976; Clifford, 2002; Zavitz et al., 2016). While most effects of  
83 adaptation indicate that it will improve discrimination thresholds (Kohn, 2007), there are also  
84 examples of adaptation impairing discrimination (Regan and Beverley, 1985; Ollerenshaw et al.,  
85 2014). This could be due to differences in the effects of adaptation on task-related information  
86 encoded in the cortex, or how that information is used by downstream circuits to enable  
87 behavior.

88

89 We find that adaptation in mouse visual cortex increases orientation discrimination thresholds.  
90 This is surprising since the effects of adaptation that we observe on visually responsive neurons

91 increase the information about orientation in V1. This inconsistency between behavioral and  
92 neural results suggests that the animal fails to make use of the extra information present in the  
93 adapted population response. Indeed, both a neural decoder fit to the behavioral data and  
94 additional psychophysical experiments suggest that the animal is relying primarily on neurons  
95 that are tuned to the target stimuli. Thus, in this behavior, the underlying perceptual choice  
96 circuit does not utilize either a robust identification of stimulus orientation or an optimal task-  
97 specific computation. The utilization of only the minimal necessary information, despite costs to  
98 performance, may be the result of a prioritization of rapid processing and simple learning rules.

99

## 100 **Results**

101

### 102 **Adaptation has prolonged effects on the amplitude and selectivity of visual responses**

103

104 In order to understand how adaptation impacts sensory encoding, and therefore influences  
105 performance on an orientation discrimination task, we first sought to characterize the time  
106 course of adaptation in the mouse primary visual cortex (V1). Using video-rate two-photon  
107 imaging, we measured visually-evoked responses in layer 2/3 of V1 in alert mice transgenically  
108 expressing the calcium indicator GCaMP6 (see Methods). Mice passively viewed pairs of brief,  
109 identical static gratings (100 ms) presented at a range of inter-stimulus-intervals (ISIs: 0.25–4 s;  
110 **Figure 1a**). At short intervals, neurons in V1 have significantly reduced responses to the second  
111 stimulus and gradually recover ( $\tau=592$  ms) with increasing ISI ( $n=245$  cells, 5 mice; one-way  
112 anova ( $p<10^{-17}$ ) with post-hoc Tukey HSD compared to non-adapted responses (250 ms:  $p<10^{-7}$ ;  
113 500 ms:  $p<10^{-7}$ ; 1 s:  $p<0.0001$ ; 2 s:  $p=1.0$ ; 4 s:  $p=0.96$ ); **Figure 1b-c**). We do not think that this  
114 strong adaptation is an artifact of either indicator or spike rate saturation because there was no  
115 relationship between response amplitude and degree of adaptation either within (normalized  
116  $dF/F$  after 250 ms ISI for preferred versus neighboring orientation:  $p=0.37$ ; Wilcoxon rank sum

117 test; **Figure 1d**) or across cells (linear regression:  $r^2=0.003$ ,  $p=0.42$ ; **Figure 1e**). Further, the  
118 degree of adaptation measured with extracellular single unit recording was similar to, though  
119 significantly stronger than, data collected with calcium imaging (two-way anova: main effect of  
120 recording method:  $p<0.001$ ; **Figure 1f-h**). Thus, the effects of adaptation are strong and  
121 relatively long-lasting compared to the duration of the stimulus.

122  
123 A large component of cortical adaptation is stimulus-specific, and can thus have diverse effects  
124 that depend on the difference between a neuron's preferred orientation and the adapter (Müller  
125 et al., 1999; Dragoi et al., 2000; Stroud et al., 2012; Patterson et al., 2013). To determine how  
126 adaptation alters orientation tuning in mouse V1, and predict how these effects might impact  
127 discrimination, we measured the orientation tuning of a population of layer 2/3 neurons with and  
128 without adaptation to a vertical grating (**Figure 2a-c**). Adaptation significantly reduces  
129 responses to stimuli near the adapter orientation (difference in normalized dF/F: two-way anova,  
130 main effect of orientation –  $p<10^{-6}$ ;  $n=241$  cells, 12 mice; **Figure 2d**), and this effect is larger and  
131 affects a broader range of stimuli when the ISI is short (two-way anova, main effect of interval –  
132  $p<0.0001$ ; **Figure 2d**). Moreover, the peak responses of neurons with preferred orientations  
133 near the adapter are significantly reduced (normalized peak amplitude: two-way anova, main  
134 effect of orientation –  $p<10^{-5}$ ; main effect of interval –  $p<0.05$ ; **Figure 2e**) and their tuning curves  
135 repelled away from the adapter (change in preferred orientation: two-way anova, main effect of  
136 orientation –  $p<10^{-24}$ ; main effect of interval –  $p<0.01$ ; **Figure 2f**). In addition, neurons with  
137 preferred orientations orthogonal to the adapter have a significant increase in orientation  
138 selectivity index (OSI; difference from control OSI: two-way anova, main effect of orientation –  
139  $p<0.01$ ; main effect of interval –  $p<0.01$ ; **Figure 2g**), likely due to selective adaptation of  
140 responses on the flanks of their tuning curves (Dragoi et al., 2002). Thus, adaptation alters the  
141 amplitude, preference and selectivity of neuronal responses in V1 in a manner very similar to

142 what has been previously observed in carnivores and primates (Müller et al., 1999; Dragoi et al.,  
143 2000; Patterson et al., 2013).

144

#### 145 **Orientation identification models predict that adaptation improves discrimination**

146

147 Theoretical investigations using optimal decoding strategies to estimate stimulus orientation  
148 predict that adaptation to distractor stimuli should improve discrimination (Clifford et al., 2001;  
149 Stocker and Simoncelli, 2006; Zavitz et al., 2016). This is because many of these strategies  
150 work by considering the activity of each neuron as some number of votes in favor of the  
151 proposition that the presented stimulus was actually the preferred stimulus of that  
152 neuron. Adaptation thus causes a reduction in the number of votes for stimulus values near the  
153 adapting stimulus resulting in a stimulus estimate that is biased away from the adapting  
154 stimulus. More generally, biases away from the adapting stimulus can result from unbalanced  
155 changes in the signal-to-noise ratio (SNR) of the population response in which SNR increases  
156 for stimulus values near to the adapting stimulus relative to those stimulus values that are  
157 further away (Stocker and Simoncelli, 2006). The effect of the bias in stimulus estimate would  
158 be to increase both hits (correct identification of targets) and false alarms (identification of  
159 distractors as targets) by repelling the stimulus value away from the distractor. In contrast, the  
160 effect of the decrease in variance is associated with an increase in hits and a decrease in false  
161 alarms, by increasing the reliability of estimates close to the adapting stimulus.

162

163 To test these hypotheses, we applied the neural data collected from the mouse visual cortex to  
164 an optimal decoder of orientation. Specifically, for each dataset, we identified 10-15 well-tuned  
165 neurons and used their activity to empirically construct a probabilistic decoder of neural activity.  
166 The decoder assumes only that the posterior distribution across orientations given neural  
167 responses is von Mises (i.e. tuned to orientation) and that neural activity is linearly related to the

168 log of this posterior (Ma et al., 2006). Thus, we extracted the maximum of the posterior  
169 probability distribution to reliably estimate the orientation of the stimulus presented on individual  
170 trials across all adaptation conditions (**Figure 3b**). While adaptation did not significantly alter the  
171 bias in estimated orientation, shorter ISIs significantly decreased the variability of the estimate  
172 (250 ms vs. 750 ms:  $p < 10^{-5}$ ; F-test; **Figure 3b**) consistent with the expectation that adaptation  
173 improves the SNR in this class of models (Clifford et al., 2001; Stocker and Simoncelli, 2006;  
174 Zavitz et al., 2016).

175

176 In order to test the effects of adaptation on discrimination, instead of just stimulus estimation, we  
177 generated neurometric functions measuring the discriminability of the target and distractor  
178 stimuli. We compared the distributions of single trial estimates of stimulus orientation for each  
179 target stimulus to the distribution of estimates in response to the distractor stimulus (in the  
180 adapted condition to mimic the state of the distractor in our task). We summarized the average  
181 neurometric function as the area under the Receiver Operating Characteristic curve (auROC)  
182 statistic. In our data, the major effect of adaptation is to decrease the variance of the estimated  
183 orientation. Consistent with this, the auROC increased in the presence of adaptation for small  
184 orientation changes (250 ms vs. 750 ms:  $22.5^\circ$ :  $p < 0.001$ ;  $n=10$  mice; paired t-test; **Figure 3c**)  
185 and was not significantly different for distractor stimuli ( $0^\circ$ :  $p=0.14$ ).

186

187 Similarly, alternative optimal estimators that use the posterior probability distribution as the  
188 decision variable (auROC-  $22.5^\circ$ :  $p < 0.0001$ ;  $0^\circ$ :  $p=0.08$  paired t-test; **Figure 3d**) or that assume  
189 independent Poisson statistics (auROC-  $22.5^\circ$ :  $p < 0.05$ ;  $0^\circ$ :  $p=0.19$ ; paired t-test; **Figure 3e**)  
190 predict an improvement in discrimination of small orientation differences. We also tried a  
191 suboptimal orientation estimator using a population vector, and again found that adaptation  
192 decreases discrimination threshold (auROC-  $22.5^\circ$ :  $p < 0.01$ ;  $0^\circ$ :  $p=0.71$ ; paired t-test; **Figure 3f**).



193 Thus, all variants of population-based orientation identification that we tested predict that  
194 adaptation will decrease thresholds on a discrimination task.

195

### 196 **Adaptation increases orientation discrimination thresholds**

197

198 To determine whether adaptation in fact improves orientation discrimination, we designed a task  
199 in which the mouse needs to use information about the orientation of visual stimuli to earn  
200 reward. In this task, head-restrained mice are trained to press a lever to initiate a trial and  
201 release it to report a target orientation (**Figure 4a** and **Supplementary Movie 1**). On each trial,  
202 the lever press triggers the serial presentation of 2-9 gratings of the same orientation  
203 (“distractors”; 100 ms duration; mice were trained with either a 0° (n=9) or 45° (n=2) distractor)  
204 in which each presentation is separated by a randomly selected ISI (250, 500, or 750 ms) that  
205 prevents the mouse from anticipating the upcoming interval. The number of distractor stimuli on  
206 each trial is also variable to prevent the mouse from anticipating the target presentation (range  
207 of differences from the distractor: 9-90°). If the mouse releases the lever within a window 200-  
208 550 ms following the onset of the target stimulus, it is considered a hit; if the mouse releases the  
209 lever within the same window following a distractor stimulus, it is considered a false alarm (FA).  
210 Thus, this task allows us to compare the discrimination threshold and FA rate for stimuli  
211 following different ISIs, and therefore in different adaptation states.

212

213 We find that the discrimination threshold is increased when the ISI is short (one-way anova with  
214 post-hoc Tukey HSD compared to 250 ms: 500 ms: p=0.21; 750 ms: p=0.002; n=11 mice;  
215 **Figure 4b-c**). Although discrimination threshold decreases with trial length ( $p < 10^{-3}$ , one-way  
216 anova; **Figure 4 – figure supplement 1a**), and trials with a short pre-target ISI are, by definition,  
217 shorter than those with long ISIs ( $p < 10^{-13}$ , one-way anova; **Figure 4 – figure supplement 1c**),

218 the ISI-dependent changes in threshold remain intact after matching the trial length across ISIs  
219 (two-way anova, main effect of method- all versus matched trials:  $p=0.18$ , **Figure 4 – figure**  
220 **supplement 1d**). This suggests that the effects of trial length and ISI on discrimination  
221 threshold are independent from each other. Indeed, the effect of ISI on discrimination threshold  
222 is also the same for both short and long trials (two-way anova- main effect of trial length:  
223  $p=0.36$ ; **Figure 4 – figure supplement 1e**). Importantly, we found that arousal state is stable  
224 across ISIs because there is 1) no significant difference in lapse rate across ISIs (250 ms:  
225  $0.05\pm 0.01$ ; 500 ms:  $0.05\pm 0.01$ ; 750 ms:  $0.05\pm 0.01$ ;  $p=0.97$ ; one-way anova;  $n=11$  mice); and 2)  
226 no difference in pupil size preceding correctly detected or missed targets ( $p=0.87$ , paired t-test;  
227  $n=3$  mice; **Figure 4 – figure supplement 2a-c**) or across ISIs ( $p=0.96$ , one-way anova;  $n=3$   
228 mice; **Figure 4 – figure supplement 2d-f**). We also considered the possibility that the  
229 uncertainty in the timing of stimulus appearance might be influencing the animals' behavior, for  
230 instance by generating surprise at the appearance of stimulus earlier or later than expected.  
231 However, we found animals also have a lower threshold for longer intervals when ISIs were  
232 interleaved on a trial-by-trial rather than presentation-by-presentation basis (500 ms vs 250 ms:  
233  $p=0.01$ , paired t-test;  $n=3$  mice). Thus, adaptation state has an acute effect on discrimination  
234 threshold.

235

236 We also find a decrease in FA rate with adaptation (one-way anova with post-hoc Tukey HSD  
237 compared to 250 ms: 500 ms:  $p=0.22$ ; 750 ms:  $p<10^{-8}$ ; **Figure 4d** and **Figure 4 – figure**  
238 **supplement 1b-d,f**). One interpretation of the observed increase in FA rate following longer  
239 intervals is that there is an increase in impatient responses during the extended ISI. If true, this  
240 would lead to an increase in release probability shortly after the stimulus on long intervals.  
241 However, inspection of the distribution of reaction times reveals the opposite effect: the  
242 distribution of releases to distractor stimuli following short intervals had shorter latencies than  
243 those following longer intervals (one-way anova with post-hoc Tukey HSD compared to 250 ms:

244 mean reaction time: 500 ms:  $p < 10^{-6}$ ; 750 ms:  $p < 10^{-8}$ ;  $n=11$  mice, example mouse in **Figure 4e**).

245 The distributions of reaction times are consistent with there being two classes of FAs: 1)

246 releases following distractor stimuli in which the mouse guessed that it was a target; and 2)

247 “spontaneous” releases due to non-sensory factors (i.e. impatience). The platykurtic distribution

248 of reaction times in the 250 ms ISI condition is a hallmark of this latter, non-sensory behavior

249 (Tiefenau et al., 2006). In contrast, the comparatively leptokurtic distribution following the longer

250 intervals suggests that the majority of these are stimulus-driven releases (one-way anova with

251 post-hoc Tukey HSD compared to 250 ms: 500ms:  $p=0.76$ ; 750ms:  $p=0.002$ ; 22.5° target:  $p < 10^{-6}$ ;

252 **Figure 4g**). In fact, the distribution of responses following the 750 ms ISI closely resembled

253 the reaction time distribution when a 22.5° target stimulus was presented (one-way anova with

254 post-hoc Tukey HSD of 750 ms ISI distractor compared to 22.5° target:  $p=0.07$ ; **Figure 4f-g**).

255 Notably, ISI had no effect on the distribution of responses to 22.5° targets (kurtosis- 250 ms:

256  $3.8 \pm 0.3$ ; 500 ms:  $4.1 \pm 0.4$ ; 750 ms:  $3.5 \pm 0.5$ ;  $p=0.62$ , one-way anova), suggesting that the

257 majority of these responses are stimulus driven in all conditions. Thus, adaptation reduces the

258 FA rate by decreasing the likelihood of a stimulus-driven response to a distractor.

259

260 In this task, adaptation decreases both hit and FA rate. Such concomitant changes in hit and FA

261 rate are often associated with changes in bias ( $c$ ) as measured using signal detection theory

262 (Green and Swets, 1966). Indeed, adaptation does significantly increase  $c$  (22.5° target- 250

263 ms:  $1.28 \pm 0.06$ ; 500 ms:  $1.08 \pm 0.05$ ; 750 ms:  $0.75 \pm 0.06$ ;  $p < 10^{-5}$ ; one-way anova;  $n=11$  mice).

264 However, this is due to a reduction in the amplitude of both targets and distractors (**Figure 2**)

265 thereby shifting the optimal criterion, and resulting in an increase in measured bias (Witt et al.,

266 2015). This supports the argument that adaptation increases discrimination thresholds through

267 its effect on sensory processing in the visual cortex.

268

269 To determine whether the activity in visual cortical circuits is necessary for the behavioral effects  
270 of adaptation on discrimination, we used an optogenetic approach to transiently suppress  
271 activity in V1 on randomly interleaved trials (**Figure 5a-c**; see Methods). The light power was  
272 titrated to decrease hit rates for small orientation differences ( $22.5^\circ$ -  $p < 0.05$ , paired t-test,  $n = 4$   
273 mice) without affecting performance on easy trials ( $90^\circ$ -  $p = 0.54$ , paired t-test). Suppression of  
274 V1 increased the discrimination threshold for all ISIs (two-way anova, main effect of V1  
275 inhibition -  $p < 10^{-8}$ ; main effect of interval -  $p < 10^{-6}$ ; **Figure 5d**) and significantly reduced the  
276 dependence of threshold on ISI (two-way anova, main effect of V1 inhibition -  $p < 0.01$ ; **Figure**  
277 **5e**). Suppression of V1 also reduced the FA rate (two-way anova, main effect of V1 inhibition -  
278  $p < 10^{-5}$ ; main effect of interval -  $p < 10^{-7}$ ; **Figure 5f**) and its dependence on ISI (two-way anova,  
279 main effect of V1 inhibition -  $p < 0.01$ ; **Figure 5g**). Importantly, there was no effect of either V1  
280 inhibition or ISI on lapse rate (control- 250 ms:  $0.15 \pm 0.05$ ; 500 ms:  $0.12 \pm 0.05$ ; 750 ms:  
281  $0.16 \pm 0.04$ ; V1 inhibition- 250 ms:  $0.16 \pm 0.04$ ; 500 ms:  $0.16 \pm 0.04$ ; 750 ms:  $0.14 \pm 0.04$ ; main effect  
282 of V1 inhibition:  $p = 0.80$ ; main effect of ISI:  $p = 0.83$ ; two-way anova). This suggests that circuits  
283 in V1 are involved in orientation discrimination (Glickfeld et al., 2013), and that adaptation state  
284 in these circuits impacts task performance.

285

## 286 **Behavioral evidence for a task-specific circuit that preferentially weights target-preferring** 287 **neurons**

288

289 The effects of adaptation on neuronal activity and behavior are at odds with each other. The  
290 neuronal data suggests that there is increased information about the stimulus orientation under  
291 adaptation, but the mouse clearly fails to take advantage of this information in the task.  
292 However, perception is constrained not only by the information available, but also by the  
293 computation adopted for decoding that information. Thus, our goal is to infer the perceptual

294 choice circuit used to perform this task by identifying a computation that is consistent with the  
295 effects of adaptation on behavior: namely an increase in threshold and a decrease in FA rate.

296

297 Our previous analysis suggests that the behavior is not consistent with any of the tested  
298 computations that estimate stimulus orientation (**Figure 3**). However, there are multiple  
299 alternate solutions that the mouse could have adopted to solve this discrimination task. One  
300 such generalist strategy might be to compare each stimulus to the one that preceded it and  
301 declare whether it is the same or different (a change detection). To test whether the mouse  
302 adopts this general strategy, we perturbed the task parameters. We tested animals trained on  
303 the task in **Figure 4** on a new task where the distractor orientation could either be the trained  
304 orientation ( $0^\circ$ ) or rotated  $15^\circ$  or  $-15^\circ$  from the trained orientation (randomly interleaved on a  
305 trial-by-trial basis), with the set of target orientations rotated  $9-90^\circ$  counter-clockwise relative to  
306 the distractor orientation (**Figure 6a**). If the mouse adopts the generalist change detection  
307 strategy, the psychometric curves for the three distractor conditions should be the same. This is  
308 because task difficulty depends only on the difference between the target and distractor  
309 orientations, not on the absolute distractor orientation (**Figure 6b**). However, we found that all  
310 six mice had lower discrimination thresholds in the  $15^\circ$  condition (rotated towards learned  
311 targets) when compared to the  $0^\circ$  condition, which in turn had lower discrimination thresholds  
312 than in the  $-15^\circ$  condition (rotated away from learned targets; one-way anova,  $p < 10^{-4}$ ,  $n=6$  mice;  
313 **Figure 6d-e**). The effects on FA rates were not symmetric: all six mice had higher FA rates in  
314 the  $15^\circ$  condition when compared to the  $0^\circ$  condition (one-way anova with post-hoc Tukey HSD  
315 compared to  $0^\circ$ ,  $p < 0.05$ ,  $n=6$  mice; **Figure 6e**), but no difference in FA rate between the  $0^\circ$  and -  
316  $15^\circ$  conditions (one-way anova with post-hoc Tukey HSD  $-15^\circ$  compared to  $0^\circ$ ,  $p=0.97$ ). This  
317 clearly indicates that the mouse is not performing a generic change detection task.

318 Instead, the result is more consistent with a task-specific strategy where the mouse has  
319 learned that  $0^\circ$  gratings are distractors while all stimuli with positive orientation are targets. This

320 can be accomplished by a perceptual choice circuit that more strongly weights neurons with  
321 preferred orientation close to 90° (**Figure 6c**).

322

323 **The effects of adaptation are consistent with a perceptual choice circuit that ignores**  
324 **distractor preferring neurons**

325

326 The mouse's behavior suggests that it is using a task-specific strategy that does not require  
327 orientation identification to perform this task. Thus, we hypothesized that the perceptual choice  
328 circuit might be taking advantage of a linear combination of neuronal activity that directly  
329 separates targets from distractors. To predict how the circuit might be combining the population  
330 activity to accomplish this task-specific computation, we used a linear combination of neuronal  
331 activity (from the same subpopulations of 10-15 well-fit neurons from each data set used in  
332 **Figure 3**) to fit the average behavioral data in **Figure 4** (**Figure 7 – figure supplement 1a**).

333 Consistent with the behavioral result in **Figure 6**, the weights found from this fit were not equal  
334 across the population, with neurons preferring target orientations tending to have positive  
335 weights (orientation preference greater than 11.25° from the distractor:  $p < 0.001$ ; Student's t-test  
336 **Figure 7a**). However, the weights assigned to neurons preferring stimuli closer to the distractor  
337 orientation were not significantly different from zero (orientation preference within 11.25° of the  
338 distractor:  $p = 0.3$ ). This was surprising since an optimal classifier should both positively weight  
339 the target orientations (to increase the probability of identifying a target stimulus) and negatively  
340 weight the distractor orientation (to decrease the probability of mistaking it for a target).

341

342 To test this hypothesis, we generated an optimal task-specific decoder by training a logistic  
343 regression in the control condition to correctly discriminate distractor and target stimuli and then  
344 tested in the two adaptation conditions. Indeed, the weights found by the logistic regression  
345 were also not equally distributed across the population. As expected, neurons preferring target

346 orientations tended to have positive weights ( $p < 10^{-5}$ ; Student's t-test; **Figure 7b**), while neurons  
347 preferring stimuli closer to the distractor orientation tended to have negative weights ( $p < 0.05$ ).  
348 However, the logistic regression also failed to correctly predict the direction of the behavioral  
349 effects (auROC- 22.5°:  $p = 0.06$ ; 0°:  $p = 0.23$ ; **Figure 7 – figure supplement 1b**). The same was  
350 true when we trained the decoder on all adaptation states.

351  
352 This suggests that the behavior may be generated by properly, or at least positively, weighting  
353 the target neurons while largely ignoring the neurons that are tuned to the distractor. To test  
354 whether this positive weighting of the target responsive neurons is sufficient to explain the  
355 direction of the effects of adaptation on behavior, we set the weights of each neuron to one,  
356 zero or negative one according to its orientation preference. Indeed, if we generated a  
357 suboptimal weighting of inputs, where those neurons with preferences less than 30° were set to  
358 zero, while those above 30° were set to one, the decoder reliably predicted an increase in  
359 discrimination threshold and a decrease in FA rate with adaptation (auROC for 250 vs 750 ms:  
360 22.5°:  $p < 0.01$ ; 0°:  $p < 0.05$ ; paired t-test; **Figure 7c**). The effect is not significant, though trends in  
361 the same direction, if the threshold for positive weights is set at 60° (22.5°:  $p = 0.15$ ; 0°:  $p = 0.25$ ;  
362 paired t-test). However, any addition of negative weights to distractor preferring neurons  
363 inverted the relationship between adaptation states such that increasing adaptation predicted a  
364 decrease in threshold and no change in false alarm rate (<15°: auROC- 22.5°:  $p < 0.01$ ; 0°:  
365  $p = 0.25$ ; <30°: auROC- 22.5°:  $p < 0.05$ ; 0°:  $p = 0.19$ ; paired t-test; **Figure 7c**). Thus, the observed  
366 effects of adaptation on orientation discrimination are consistent with a suboptimal computation  
367 in which the downstream perceptual choice circuit performs an all-positive integration of the  
368 population activity (**Figure 7d**).

369

## 370 **Discussion**

371

372 In order to determine how decision-making circuits use information from orientation tuned  
373 neuronal populations, we trained the mice to perform a multi-interval, go/no-go orientation  
374 discrimination task. We find that adaptation impairs the animal's ability to discriminate target  
375 orientations both in terms of threshold and fraction of rewarded trials (22.5° target, accounting  
376 for difference in false alarm rate: 250 ms- 24% trials rewarded; 750 ms: 34.7% trials rewarded).  
377 These behavioral data are consistent with a suboptimal computation in which the perceptual  
378 choice circuit relies on neurons that prefer target stimuli but fails to appropriately negatively  
379 weight neurons that prefer the distractor. This suggests that the brain is not always optimal, and  
380 may instead be more opportunistic in its approach for solving perceptual tasks.

381  
382 In this study we use the term optimal to describe the computation purely from the perspective of  
383 the best possible use of the information present in the network that can be extracted linearly.  
384 Indeed, the optimal computation (using the neuronal weights from the logistic regression) does  
385 significantly better on our discrimination task than the suboptimal computation (using the  
386 neuronal weights from the behavioral fit) that discards the activity of distractor-preferring  
387 neurons (percent correct- optimal: 97%; suboptimal: 90%;  $p < 10^{-6}$ ). Thus, the finding that the  
388 brain favors a suboptimal computation to discriminate orientation may tell us something about  
389 the constraints of the circuit. All of the optimal computations that we considered, including  
390 orientation estimation and the task-specific logistic regression, require the negative weighting of  
391 specific populations. Such a negative weighting cannot be achieved mono-synaptically and  
392 requires a neuron-specific recruitment of inhibition and so may be more difficult to learn (**Figure**  
393 **7d**).

394  
395 On the other hand, the computation suggested by our neural fit to the behavioral data relies only  
396 on an excitatory, feed-forward circuit. The perceptual choice circuit may learn though  
397 experience to rely on the activity of neurons which increase their activity in response to targets.



398 This computation is amenable to a simple associative learning rule (Law and Gold, 2009;  
399 Znamenskiy and Zador, 2013; Xiong et al., 2015). For instance, the positive weighting of target  
400 neurons might be achieved through Hebbian long-term synaptic potentiation, while the lack of  
401 weight on the distractor neurons might be achieved through long-term depression. This  
402 proposed circuit could be directly tested by new tools that allow for the specific activation of  
403 functional subsets of neurons in behaving animals (Mardinly et al., 2018).

404

405 The demonstration that the mice are using a suboptimal computation is surprising, though there  
406 is certainly precedence for this (Beck et al., 2012; Ho et al., 2012; Oh et al., 2016). It is possible  
407 that the strategy used to train the mice to perform this task, or the specific task parameters  
408 used, supported the development of this suboptimal computation. For instance, the optimal  
409 circuit imposes at least one synaptic delay and requires additional integration time in the  
410 recurrent network. The suboptimal computation may thus support the fast decision-making  
411 needed in the discrimination task. This may be a general approach for fast decision-making:  
412 there is evidence that the human cortex uses suboptimal computations that ignore distractors or  
413 weakly informative features, especially under time constraint (Ho et al., 2012; Oh et al., 2016).

414

415 Notably there are multiple computations, general and task-specific, that can be used to  
416 successfully solve our discrimination task. The effects of adaptation (**Figure 4**) and subtle  
417 changes in distractor orientation on the animals' performance (**Figure 6**) are consistent with the  
418 mice having adopted task-specific strategies for both target identification and discrimination.  
419 The finding that the mice use task-specific strategies is not surprising. Evidence from human  
420 behavioral experiments suggest that participants are likely to adopt task-specific strategies  
421 when they are trained on a small number of conditions (Fulvio et al., 2014) and experience large  
422 numbers of trials (Ramachandran and Braddick, 1973; Ball and Sekuler, 1982; Zhang et al.,  
423 2010).

424

425 While the task-specific, suboptimal perceptual choice circuit is viable, it leaves the animal  
426 vulnerable to systematic error. By relying on the absolute firing rate of a subset of neurons,  
427 anything that increases firing rates can be mistaken for a target. We think that this is why the  
428 mice have a high FA rate following long intervals: the recovery from adaptation with long  
429 intervals results in larger than expected firing rates, making the animal respond as if a target  
430 had been presented (**Figure 4d-g**). Indeed, reducing the firing rates in V1 by optogenetic  
431 activation of inhibitory neurons results in a decrease in hit and FA rates, consistent with the  
432 hypothesis that the perceptual choice circuit is summing the total activity in this area (**Figure 5f**).  
433 Moreover, the disproportional decrease in FA rates (and increase in threshold) with suppression  
434 of V1 is consistent with effects of ISI on behavior acting through effects on sensory coding, and  
435 not through more cognitive mechanisms like forward masking and attentional blink (Raymond et  
436 al., 1992; Macknik and Livingstone, 1998; Alwis et al., 2016). Notably, these phenomena also  
437 tend to act on much shorter time-scales (tens of milliseconds) than intervals used in this study,  
438 making them unlikely candidates to explain the effects of ISI on behavior. Finally, the lack of  
439 effect of ISI on lapse rate also argues against a cognitive mechanism for the effects of ISI on  
440 behavior.

441

442 The neuronal data that we used to generate the model predictions was collected from naïve  
443 mice that were passively viewing the visual stimuli. This was done to generate full orientation  
444 tuning curves in the adapted and unadapted conditions, as well as to avoid contamination of  
445 non-sensory signals. However, this means that the effects of training or active behavioral  
446 engagement are not included in our model predictions. Since the tuning of visual cortical  
447 neurons can be affected by visual experience (Schoups et al., 2001; Kreile et al., 2011;  
448 Goltstein et al., 2013), it is possible that our task training paradigm (abundance of 0° distractors  
449 and 90° targets, 6 day/week, >3 months) induced a change in the representation of orientation

450 in V1 neurons. However, the orientation identification models are designed to account for  
451 skewed distributions, and do an excellent job of predicting the orientation of the stimulus despite  
452 the over-abundance of cardinal orientation preferring neurons (**Figure 3b**). Thus, we do not  
453 expect that experience-dependent changes in the representation of orientation would  
454 substantially affect orientation identification models' predictions. On the other hand, the degree  
455 of adaptation is dependent on both the number of adapters preceding the target (**Figure 4 -**  
456 **figure supplement 1g-h**) as well as task engagement (Keller et al., 2017), and therefore the  
457 mapping of the neural data onto the behavioral data may not be straightforward. Nonetheless,  
458 we were able to reliably fit the neural data to the behavioral data (**Figure 7 – figure**  
459 **supplement 1a**), suggesting that there may in fact be a linear transform of firing rates across  
460 behavioral state.

461  
462 Our behavioral, physiological and computational approaches reveal that the circuit adopts a  
463 suboptimal computation to solve an orientation discrimination task. This reveals that models for  
464 decoding sensory signals must be rigorously tested with experiments, and that the perceptual  
465 choice circuit may not always be optimized for the best use of available information. In this case,  
466 while ignoring important information leaves the mouse vulnerable to the effects of adaptation, it  
467 enables both fast associative learning and fast decision making via a simple feedforward circuit.

468

## 469 **Methods**

470 **Animals.** All animal procedures conformed to standards set forth by the NIH, and were  
471 approved by the IACUC at Duke University. 33 mice (both sexes; 3-24 months old; singly and  
472 group housed (1-4 in a cage) under a regular 12-h light/dark cycle; C57/B6J (Jackson Labs  
473 #000664) was the primary background with up to 50% CBA/CaJ (Jackson Labs #000654)) were  
474 used in this study. Ai93 (*tm93.1(tetO-GCaMP6f)Hze*, Jackson Labs #024103; n = 4) and Ai94

475 (*tm94.1(tetO-GCaMP6s)Hze*, Jackson Labs #024104; n = 8) were crossed to *EMX1-IRES-Cre*  
476 (Jackson Labs #005628) and *CaMK2a-tTA* (Jackson Labs #003010) to enable constitutive  
477 GCaMP6 expression for *in vivo* imaging experiments. *Pvalb-cre (tm1(cre)Arbr*, Jackson Labs  
478 #008069; n = 13), *VGAT-ChR2-EYFP (Slc32a1-COP4\*H134R/EYFP*, Jackson Labs #014548; n  
479 = 3) and *Emx1-IRES-Cre (tm1(cre)Krj*, Jackson Labs # 005628; n = 2) were crossed to C57/B6J  
480 mice for *in vivo* extracellular electrophysiology (n = 4) and behavior (n = 14) experiments. *Gad2-*  
481 *IRES-cre (Gad2<sup>tm2(cre)Zjh</sup>*, Jackson Labs #010802; n = 2) and C57/B6J (n = 1) mice were crossed  
482 to CBA/CaJ for eye-tracking experiments.

483

484 **Cranial window implant.** Dexamethasone (3.2 mg/kg, s.c.) and Meloxicam (2.5 mg/kg, s.c.)  
485 were administered at least 2 h before surgery. Animals were anesthetized with ketamine (200  
486 mg/kg, i.p.), xylazine (30 mg/kg, i.p.) and isoflurane (1.2-2% in 100% O<sub>2</sub>). Using aseptic  
487 technique, a headpost was secured using cyanoacrylate glue and C&B Metabond (Parkell), and  
488 a 5 mm craniotomy was made over the left hemisphere (center: 2.8 mm lateral, 0.5 mm anterior  
489 to lambda) allowing implantation of a glass window (an 8-mm coverslip bonded to two 5-mm  
490 coverslips (Warner no. 1) with refractive index-matched adhesive (Norland no. 71)) using  
491 Metabond.

492 The mice were allowed to recover for one week before habituation to head restraint.  
493 Habituation to head restraint increased in duration from 15 min to >2 h over 1-2 weeks. During  
494 habituation, imaging and electrophysiology sessions, mice were head restrained while allowed  
495 to freely run on a circular disc (InnoWheel, VWR). Wheel revolutions were monitored with a  
496 digital encoder.

497

498 **Visual stimulation.** Visual stimuli were presented on a 144-Hz LCD monitor (Asus) calibrated  
499 with an i1 Display Pro (X-rite). The monitor was positioned 21 cm from the contralateral eye.  
500 Circular 30° gabor patches containing static sine-wave gratings (0.1 cycles per degree)

501 alternated with periods of uniform mean luminance (60 cd/m<sup>2</sup>). Visual stimuli for imaging,  
502 electrophysiology and behavior experiments were controlled with MWorks ([http://mworks-](http://mworks-project.org)  
503 [project.org](http://mworks-project.org)).

504 Three visual stimulus protocols were used for imaging experiments: 1) Paired-pulse,  
505 same orientation (**Figure 1**); 2) Paired pulse, different orientation (**Figure 2**); and 3) Six-pulse,  
506 random interval, random target (**Figure 4 – figure supplement 1g**). In protocol 1 (n = 5 mice),  
507 two static, 100 ms sine-wave gratings of the same orientation (0°, 30°, 60°, 90°, 120°, or 150°)  
508 were successively presented with a variable inter-stimulus interval (ISI: 0.25, 0.5, 1, 2, or 4 s)  
509 and an inter-trial interval (ITI) of 4s. Measurement of adaptation was averaged across all  
510 orientations, except in **Figure 1d**. In protocol 2 (n = 12 mice), a static, 100 ms sine-wave vertical  
511 grating (0°; “adapter”) was followed by a 100 ms grating (“test”) of varying orientation (0°, 22.5°,  
512 45°, 67.5°, 90°, 112.5°, 135°, or 157.5°) after a variable ISI (250 or 750 ms), with an ITI of 8 s.  
513 On 30% of trials, the first stimulus was omitted to measure the non-adapted (control) tuning  
514 curve. In protocol 3 (n = 3 mice), five static, 100 ms vertical sine-wave gratings were  
515 successively presented followed by a 100 ms grating of varying orientation (30° or 90°), with an  
516 ITI of 8 s. ISIs (250, 500 or 750 ms) were selected on a presentation-by-presentation basis.

517 For electrophysiology experiments only protocols 1 (n=4 mice) and 3 (n=4 mice) were  
518 used. Stimuli were the same as in the imaging protocols except 1) only one orientation (0°) was  
519 used in protocol 1, and the ITI was 10s; and 2) the targets in protocol 3 were 22.5° and 90°, and  
520 the number of baseline presentations preceding the target was also randomized from 2-9 with  
521 ITI of 4 s. For all stimulus protocols, all orientations and interval conditions were randomly  
522 interleaved.

523

524 **Retinotopic mapping.** Retinotopic maps generated from either intrinsic autofluorescence or  
525 GCaMP signals. For intrinsic autofluorescence imaging, the brain was illuminated with blue light  
526 (473 nm LED (Thorlabs) or 462 ± 15 nm band filter (Edmund Optics)), and emitted light was

527 measured through a green and red filter (500 nm longpass). Images were collected using a  
528 CCD camera (Rolera EMC-2, Qimaging) at 2 Hz through a 5x air immersion objective (0.14  
529 numerical aperture (NA), Mitutoyo), using Micromanager acquisition software (NIH). Stimuli  
530 were presented at 4-6 positions (drifting, sinusoidal gratings at 2 Hz) for 10 s, with 10 s of mean  
531 luminance preceding each trial. Images were analyzed in ImageJ (NIH) to measure changes in  
532 fluorescence ( $dF/F$ ; with  $F$  being the average of all frames) to identify primary visual cortex (V1)  
533 and the higher visual areas. GCaMP imaging followed an identical procedure except light was  
534 collected with a bandpass filter ( $520 \pm 18$  nm) and total trial duration was reduced to 10 s.  
535 Vascular landmarks were used to identify targeted sites for imaging, electrophysiology and  
536 optogenetics experiments.

537

538 **Viral injection.** We targeted V1 in *Pvalb-cre* mice ( $n=2$ ) for expression of Channelrhodopsin2  
539 (ChR2). Dexamethasone (3.2 mg/kg, s.c.) was administered at least 2 h before surgery and  
540 animals were anesthetized with isoflurane (1.2-2% in 100% O<sub>2</sub>). The coverslip was sterilized  
541 with 70% ethanol and the cranial window removed. A glass micropipette was filled with virus  
542 (AAV5.EF1.dFloxed.hChR2.YFP (UPenn CS0384)), mounted on a Hamilton syringe, and  
543 lowered into the brain. 50 nL of virus were injected at 250 and 500  $\mu$ m below the pia (30  
544 nL/min); the pipette was left in the brain for an additional 10 minutes to allow the virus to infuse  
545 into the tissue. Following injection, a new coverslip was sealed in place, and an optical cannula  
546 (400  $\mu$ m diameter; Doric Lenses) was attached to the cranial window above the injection site.  
547 Optogenetic behavioral experiments were conducted at least two weeks following injection to  
548 allow for sufficient expression.

549

550 **Two-photon calcium imaging.** Images were collected with a two-photon microscope controlled  
551 by Scanbox acquisition software (Neurolabware). Excitation light (920 nm) from a Mai Tai eHP  
552 DeepSee laser (Newport) was directed into a modulator (Conoptics) and raster scanned onto

553 the brain with a resonant galvanometer (8 kHz, Cambridge Technology) through a 16X (0.8 NA,  
554 Nikon) or 25X (1.05 NA, Nikon) water immersion lens. Average power at the surface of the brain  
555 was 30-50 mW. Frames were collected at 30 Hz (256 lines) for a field of view of  $\sim 700 \times 400 \mu\text{m}$   
556 on a side. Emitted photons were directed through a green filter ( $510 \pm 42 \text{ nm}$  band filter  
557 (Semrock)) onto GaAsP photomultipliers (H10770B-40, Hamamatsu). Images were captured at  
558 a plane  $207 \pm 4 \mu\text{m}$  below the pia (range 180-250  $\mu\text{m}$ ). Frame signals from the scan mirrors  
559 were used to trigger visual stimulus presentation for reliable alignment with collection.

560

561 **Eye-tracking.** Images were collected at 30 Hz with a Genie Nano CMOS camera (Teledyne  
562 Dalsa) using a 695 nm LP filter (Midopt) controlled by Scanbox acquisition software. IR  
563 illumination (920 nm) was provided from the two-photon laser through the cranial window.

564

565 **Extracellular electrophysiology.** Electrophysiological signals were acquired with a 32-site  
566 polytrode acute probe (either A4x8-5mm-100-400-177-A32 (4 shanks, 8 site/shank at 100  $\mu\text{m}$   
567 spacing) or A1x32-Poly2-5mm-50s-177-A32, (1 shank, 32 sites, 25  $\mu\text{m}$  spacing), NeuroNexus)  
568 through an A32-OM32 adaptor connected to a Cereplex digital headstage (Blackrock  
569 Microsystems). Unfiltered signals were digitized at 30 kHz at the headstage and recorded by a  
570 Cerebus multichannel data acquisition system (Blackrock Microsystems). Visual stimulation  
571 synchronization signals were also acquired through the same system via a photodiode directly  
572 monitoring LCD output.

573 On the day of recording, the cranial window was removed, and a small durotomy  
574 performed to allow insertion of the electrode into V1. A ground wire was connected via a gold  
575 pin cemented in a burrhole in the anterior portion of the brain. The probe was slowly lowered  
576 into the brain (over the course of 15 min with travel length of around 800  $\mu\text{m}$ ) until the most  
577 superficial recording site was in the brain and allowed to stabilize for 45 - 60 min before  
578 beginning recordings. A fluorescent dye (dil, Life Technologies) was painted on the back of the

579 probe prior to recording and the probe position was thus confirmed post hoc in histological  
580 sections.

581

582 **Behavioral task.** Animals were water scheduled and trained to discriminate orientation by  
583 manipulating a lever. The behavior training and testing occurred during the light cycle. We first  
584 trained mice to detect full-field, 90° orientation changes from a static grating. Most mice (n=12)  
585 were trained with a 0° distractor; however, 2 mice were trained with a 45° distractor. On the  
586 initial days of training, mice were rewarded for holding the lever for at least 400 ms (required  
587 hold time) but no more than 20 s (maximum hold time). At the end of the required hold time, the  
588 target grating appeared and remained until the mouse released the lever (or the maximum hold  
589 time expired). Typically, within two weeks of training, the mice began releasing the lever as  
590 soon as the target appeared. Once the animals began reliably responding to the target stimulus,  
591 we added a random delay between lever press and the target presentation to discourage  
592 adoption of a timing strategy. Over the course of the next few weeks, the task was made harder  
593 by (in roughly chronological order): 1) increasing the random delay, 2) decreasing the target  
594 stimulus duration and reaction time window, 3) removing the stimulus during the ITI, 4) shrinking  
595 and moving the stimuli to more eccentric positions, 5) adding a mean-luminance ISI to mask the  
596 motion signal in the transition from distractor to target, and finally 6) reducing the difference  
597 between the distractor and the target. Delays after errors were also added to discourage lapses  
598 and early releases.

599 In the final form of the task, each trial was initiated when the ITI had elapsed and the  
600 mouse had pressed the lever. Trial start triggered the presentation of a 100 ms static sinusoidal,  
601 gabor patch (30° in diameter, positioned at an eccentricity of 30° - 40° in azimuth and 0° - 10° in  
602 elevation) followed by an ISI randomly selected on a presentation-by-presentation basis (250,  
603 500 or 750 ms). For a subset of mice (n=3), the ISI was fixed for a given trial but randomly  
604 interleaved on trial-by-trial basis (250 or 500 ms). The target appeared with a random delay (flat



605 distribution) after the first two presentations on each trial and was randomly selected from a  
606 fixed set of values around each animal's threshold. Mice received water reward if they released  
607 the lever within 100-650 ms (sometimes extended to 1000 ms) after a target occurred. However,  
608 for calculating hit and false alarm (FA) rate (**Figures 4, 5 and 6**), we use a narrower reaction  
609 window (200-550 ms) to ensure that the majority of the releases in this window are due to  
610 stimulus driven responses and have independent reaction windows for adjacent stimuli with  
611 short ISIs. Mice were initially trained with a constant distractor stimulus (**Figure 4 and 5**) and  
612 were later tested with randomly interleaved distractor orientations (the trained orientation and  
613 stimuli  $-15^\circ$  and  $+15^\circ$  from the trained orientation) selected on a trial-by-trial basis (**Figure 6**).

614 Of the 11 mice presented in **Figure 4**, some (n=5) were initially trained with a single (250  
615 ms) ISI, whereas others (n=6) were immediately introduced to having the fully interleaved  
616 condition (presentation-by-presentation selection of one of three ISIs). Training history had no  
617 significant effect on the relationship between ISI and threshold (two-way anova; main effect of  
618 ISI ( $p < 0.005$ ); main effect of training ( $p = 0.41$ )). Notably, the incorporation of targets close to the  
619 distractor occurs during the final stages of training; thus, the mice learn relatively late in training  
620 that the targets lie within only one quadrant of orientation space. Nonetheless, the FA rates from  
621 the variable baseline task (**Figure 6**) reveal that the mice understand this contingency: if the  
622 mice continued to use the strategy learned when there was only a  $90^\circ$  target, then the  $15^\circ$  and -  
623  $15^\circ$  distractors should have similar FA rates.

624 For optogenetic stimulation (**Figure 5**), we delivered blue light to the brain through the  
625 cannula from a 473 nm LED (Thorlabs) or a 450 nm laser (Optoengine) and calibrated the total  
626 light intensity at the entrance to the cannula (0.1 - 0.3 mW). On randomly interleaved trials, the  
627 light was turned on at the time of lever press and remained on until lever release. Behavioral  
628 control was done with MWorks, and custom software in MATLAB (MathWorks) and Python  
629 (<http://enthought.com>).

630

631 **Data processing.**

632 *Image processing and analysis.* All image processing and analysis was performed in MATLAB.  
633 The image stack was registered to a stable, average field of view using sub-pixel registration  
634 methods to correct for motion along the imaged plane (x-y motion). For segmentation of visually  
635 driven neurons, we used semi-automated segmentation algorithms to select regions of interest  
636 (cell masks) from the average change in fluorescence ( $dF/F$ , where  $F$  is the average  
637 fluorescence in the 20 frames (~660 ms) preceding the first stimulus in each trial) evoked in  
638 response to each stimulus type. Fluorescence time courses were generated by averaging all  
639 pixels in a cell mask. Neuropil signals were removed by first selecting a shell around each  
640 neuron (excluding neighboring neurons), estimating the neuropil scaling factor (by maximizing  
641 the skew of the resulting subtraction), and removing this component from each cell's time  
642 course.

643 Visually evoked responses were measured as the difference in the  $dF/F$  before (baseline  
644 window: average of three frames (~100 ms) around stimulus onset) and during the response  
645 (response window: average of three frames around the peak response; window was selected  
646 separately for each experiment to account for variability in response latencies and indicator  
647 kinetics). "Responsive cells" were chosen as having statistically significant visually evoked  
648 responses to at least one of the stimulus types (bonferroni-corrected paired t-test) or all stimuli  
649 (paired t-test), and the maximum derivative in the  $dF/F$  occurred before the end of the response  
650 window (to eliminate cells strongly driven by the removal of the stimulus). Using these criteria,  
651 245/279, 473/587, and 202/239 cells were included for visual stimulation protocols 1-3,  
652 respectively. All measurements are the average of at least 7 trials of the same type.

653 Cells imaged in protocol 2 (paired-pulse, different orientation) were further selected  
654 based on the reliability of their orientation tuning. Responses in the control (no adapter)  
655 condition were fit with a Von Mises function:

$$B + Re^{\kappa(\cos(2(\theta-\mu))-1)}$$

656 where  $B$  is the baseline firing rate,  $R$  is the modulation rate,  $\kappa$  is the concentration, and  $\mu$  is the  
657 preferred orientation. To measure the reliability of the fit, the fit was repeated 1000 times  
658 resampling trials with replacement. Only cells for which 90% of the bootstrapped fits were within  
659  $22.5^\circ$  of the original fit were included in further analysis (241/473 cells).

660 Analysis of the effects of adaptation on tuning (e.g. the preferred orientation and the  
661 orientation selectivity index (OSI); **Figure 2e-g**) were derived from the von Mises fit to the data.  
662 OSI was measured as:

$$OSI = \frac{R_{pref} - R_{orth}}{R_{pref} + R_{orth}}$$

663 where  $R_{pref}$  is the cell's response at the preferred orientation (Pref: maximum of the fit) and  $R_{orth}$   
664 is the response to the orthogonal orientation. In the case that  $R_{orth}$  was negative, it was set to 0.  
665 Cells were grouped according to the distance of their preferred orientation from the adapter  
666 (cells that prefer  $22.5^\circ$  and  $157.5^\circ$  were in the same group; **Figure 2e-g**).

667 For protocols 1 and 3, each cell's responses were normalized to the average response  
668 to the first stimulus. For protocol 2, each cell's responses were normalized to  $R_{pref}$ .

669  
670 *Electrophysiology processing and analysis.* Individual single units were isolated using the  
671 SpyKing CIRCUS package (<http://spyking-circus.readthedocs.io/en/latest/>). Raw data were first  
672 high pass filtered ( $> 500$  Hz) and spikes were detected when a filtered voltage trace crossed  
673 threshold (9-13 median absolute deviations computed on each channel). A combination of  
674 density-based clustering and template matching algorithms were used to automatically cluster  
675 the spikes. The resulting clusters were then inspected and adjusted manually using a MATLAB  
676 GUI. Clusters with refractory period violations ( $< 2$  ms,  $>1\%$  violation) in the auto-correlogram  
677 and that were not stable across the whole recording session were discarded from the dataset.  
678 Clusters were combined if they met each of three criteria by inspection: 1) similar waveforms; 2)  
679 coordinated refractory periods in the cross-correlogram; 3) similar inter-spike interval distribution

680 shape. Unit position with respect to the recording sites was calculated as the average of all site  
681 positions weighted by the waveform amplitude of each site. All the subsequent analysis was  
682 performed in MATLAB.

683 Local field potential (LFP) and current source density analysis (CSD). For LFP recording,  
684 the extracellular raw signal was band pass filtered from 1 to 200 Hz and downsampled to 10  
685 kHz. The CSD was computed from the average LFP by taking the discrete second derivative  
686 across the electrode sites that were linearly spaced across cortical depth, and interpolated to  
687 produce a smoothed visually driven CSD profile. This analysis transformed the LFP signal into  
688 the locations of current sources and sinks, revealing a patterned laminar distribution of sinks in  
689 V1 after the visual onset: an initial sink in layer 4 (latency: ~50 ms), followed by a sink in layer  
690 2/3 and finally a weak and sustained sink in layer 5. Therefore, guided by the visually-evoked  
691 CSD map, retrospective histology, and relative depth of recordings relative to the pia surface,  
692 layer 2/3 units were identified and chosen for comparison with the two-photon imaging dataset.

693 Visually-evoked responses of each unit in layer 2/3 of V1 were measured based on  
694 average peri-stimulus time histograms (PSTHs, bin size: 20 ms) over repeated presentations  
695 (>25 trials) of the same stimulus. Response amplitudes were measured on a trial-by-trial basis:  
696 by subtracting the firing rate at the time of the visual stimulus onset from the value at the peak of  
697 the average PSTH within a window of 0-100 ms after the visual onset. “Responsive cells” were  
698 chosen as having statistically significant visually-evoked responses (first baseline response,  
699 averaged over 0-100 ms before the visual onset, vs visually-evoked responses, averaged over  
700 0-100 ms after the visual onset; paired t-test; this analysis window excluded off-responsive units  
701 from analysis). For protocol 1, we only included the responsive units that had no significant  
702 difference in response to the first stimulus (the adapter) across five ISIs (one-way ANOVA).  
703 Similarly, for protocol 3, we included responsive units for the analysis of the normalized firing  
704 rate binned by cycle numbers (**Figure 4 - figure supplement 1h**). Using these criteria, 30/39  
705 and 17/25 layer 2/3 cells were included for visual stimulation protocols 1 and 3, respectively.

706

707 *Behavior processing and analysis.*

708 All behavioral processing and analysis were performed in MATLAB. All trials were categorized  
709 as either an early release, hit, or miss based on the time of release relative to target onset:  
710 responses occurring earlier than 100 ms after the target were considered early releases;  
711 responses occurring between 200 and 550 ms after a target were considered hits; failures to  
712 respond before 550 ms after the target were considered misses. Behavioral sessions were  
713 manually cropped to include only stable periods of performance and were further selected  
714 based on the following criteria: 1) at least 50% of trials were hits; and 2) less than 35% of trials  
715 were early releases. Based on these criteria, the data in **Figure 4** included  $17 \pm 3$  sessions  
716 (range: 5-46) for each mouse with an average of  $6348 \pm 815$  trials per mouse (range: 2593-  
717 11857); the data in **Figure 5** included  $24 \pm 5$  (range: 11-35) sessions for each mouse with  $7524$   
718  $\pm 1582$  trials (range: 5021-11710), respectively; and the data in **Figure 6** included  $20 \pm 5$   
719 sessions (range: 6-40) for each mouse with an average of  $4904 \pm 941$  trials per mouse (range:  
720 2284 - 8236).

721 Hit rate was computed from the number of hits and misses for each stimulus type:

$$\text{Hit rate} = \frac{\text{hit}}{\text{hit} + \text{miss}}$$

722 Lapse rates were measured as  $(1 - \text{Hit rate})$  for  $90^\circ$  targets. Most mice had low lapse  
723 rates (11/11 mice were below 10%) for the task in **Figure 4**. However, as mice age their  
724 reaction times become slower, thereby inflating the lapse rate; we think that this effect explains  
725 the increased lapse rate during optogenetic suppression of V1 (only 1/4 mice were below 10%  
726 in **Figure 5**).

727 Hit rates across stimulus types were fit with a Weibull function to determine  
728 discrimination thresholds (50% of the upper asymptote to account for lapse rate). No correction

729 was made for FA rate. Threshold CIs were estimated via nonparametric bootstrap resampling  
730 trials with replacement.

731 All distractor stimulus presentations were categorized as either a CR or a FA: responses  
732 occurring between 200 and 550 ms after a distractor stimulus were considered FAs;  
733 presentations where the mouse held the lever for at least 550 ms after the distractor stimulus  
734 were considered CRs. FA rate was computed from the total number of FAs and CRs in the  
735 session:

$$FA\ rate = \frac{FA}{FA + CR}$$

736 Signal detection theory (Green and Swets, 1966) was applied to calculate sensitivity ( $d'$ )  
737 and bias ( $c$ ) given the measured hit and FA rate as follows:

$$d' = Z(\text{hit rate}) - Z(\text{FA rate})$$
$$c = -\frac{Z(\text{hit rate}) + Z(\text{FA rate})}{2}$$

738 where  $Z$  is the inverse of the cumulative distribution function of the normal Gaussian  
739 distribution.

740 For matching the trial length across ISIs (Figure 4 – figure supplement 1d), trial length  
741 was first binned every 0.5 s within the range of 1.2 - 6.2 s (for hits and misses) and 1.2 - 4.2 s  
742 (for FAs and CRs) respectively. Within each bin, the same number of trials were chosen for all  
743 ISIs to ensure the average trial length was not significantly different. The selected trial number  
744 for each bin was determined by the minimum number of trials across ISIs in that bin for each  
745 mouse.

746 For calculating fraction of rewarded trials ( $P_{\text{rew}}$ ) given the 22.5°- Hit and FA rates of each  
747 ISI (250 and 750 ms), we first simulated 1000 trials where the 22.5° target is presented after six  
748 distractor 0° presentations. For a known FA rate, we calculated the fraction of early trials ( $P_{\text{early}}$ )

749 that were unrewarded assuming every 1/FA number of distractor presentations would generate  
750 an early release. Then the  $P_{rew}$  was calculated as follow:

$$P_{rew} = (1 - P_{early})Hit$$

751 *Eye-tracking processing and analysis.* All eye-tracking data was analyzed in MATLAB. The size  
752 of the pupil on each frame was extracted using the built-in function `imfindcircles`. Pupil size was  
753 normalized to the maximum radius measured during the session and quantified as the average  
754 measured in a 250 ms window preceding the target stimulus.

755

756 *Modeling.* For all modeled decoders, neurons imaged in different mice were analyzed  
757 separately and only datasets with at least 10 well-fit neurons (using the criteria above) were  
758 included in these analyses (10/12 experiments). As a result, error bars in **Figures 3, 7** and  
759 associated supplements represent standard error of the mean across data sets.

760 Log likelihood functions were generated using two methods: The first followed the  
761 equation(Jazayeri and Movshon, 2006):

$$\log L(\theta) = \sum_{i=1}^N n_i \log f_i(\theta) - \sum_{i=1}^N f_i(\theta)$$

762 where  $N$  is the number of neurons in the population,  $f_i(\theta)$  is each neuron's normalized tuning  
763 function and  $n_i$  is each neuron's response to a given stimulus. The tuning functions were  
764 obtained from well-fit, responsive neurons, in the non-adapted condition (under the assumption  
765 that the decoder is unaware of the effects of adaptation(Seriès et al., 2009)), and were used to  
766 predict the likelihood of the stimulus given single trial responses ( $n_i$ ) that varied with adaptation.

767 Because our neuronal data does not adhere to the assumptions that spiking is Poisson  
768 and independent, we also used a second more empirical method based upon the assumption  
769 that our population of neurons represented von Mises over orientation using a linear PPC(Ma et  
770 al., 2006). This approach assumes that the likelihood function takes the form:

$$\log L(\theta) = \sum_{i=0}^N a_i n_i \cos(\theta) + b_i n_i \sin(\theta)$$

771  
772 where  $n_0$  is assumed to be 1 and the  $a_i$ 's and  $b_i$ 's are discovered by maximizing the likelihood of  
773 the empirically observed joint distribution of the presented stimulus and the neural response.  
774 This results in a convex optimization problem which we solved using gradient ascent. Because  
775 this method is prone to overfitting resulting in poor cross-validation performance when the  
776 number of units greatly exceeds the number of trials per condition, in datasets with more than  
777 15 well-fit neurons, we used only the 15 best-fit neurons (as measured by their 90% CI). As a  
778 control, we also preprocessed our neural data using principle component analysis and  
779 eliminated all but the 15 dominant modes of variability and refit the empirically generated log  
780 likelihood. This had no effect on our results. The number 15 was chosen to optimize  
781 performance on the cross validated data set, however, we note that choosing values between  
782 12 and 16 did not substantially change our results.

783 The single-trial log likelihood functions were then used to determine either the MAP  
784 estimate (Method 1: **Figure 3e**; Method 2: **Figure 3b-c**) or the posterior probability distribution  
785 ("optimal decoder": **Figure 3d**). We also used a standard population vector decoder to estimate  
786 the orientation (**Figure 3f**). For this decoder a preferred stimulus value,  $\theta_i$ , was extracted from a  
787 parameterized fit to the tuning curve of each well-fit unit. Estimated orientation for each trial was  
788 then obtained from the equation:

789

$$\theta = \text{angle}\left(\sum_i n_i \begin{bmatrix} \cos(\theta_i) \\ \sin(\theta_i) \end{bmatrix}\right)$$

790

791 Logistic regression was performed using MATLAB's glmfit routine with a binary  
792 observation set to be 1 when the presented stimulus was not vertical (the adapter orientation).



793 Estimate biases were computed by taking the mean estimate as a function of stimulus  
794 and adaptation condition. Because there was no clear trend in estimate standard deviation as a  
795 function of presented orientation, we computed estimate variance in each adaptation condition  
796 by removing the bias associated with each stimulus value and concatenated the resulting  
797 estimate residuals into a single vector. In order to account for differences in the information  
798 content of each data set, estimate variances (and standard deviations) were normalized by the  
799 variance of the control condition of each data set ( $35 \pm 14$  degrees). We then concatenated the  
800 resulting normalized residuals from each data set into a single data set to measure the mean  
801 and associated standard error of the residual variances; these measures are shown in the inset  
802 of **Figure 3b**.

803 To compute the auROC we treated our estimates of orientation (or in the case of the  
804 optimal decoder and logistic regression: the probability that the orientation was not the adapter  
805 orientation) as decision variables and computed false positives and correct detections for 400  
806 uniformly sampled values of the decision criterion chosen to span all observed values of the  
807 decision variable. For the sum decoder we simply treated the total population activity on each  
808 trial as the decision variable. The auROC was then computed numerically using the trapezoid  
809 rule.

810 Note that in all cases we report only cross-validated results (using leave one out cross-  
811 validation in the control condition). This is because parameters of our neural decoders were all  
812 fit using only the control condition and not our two adaptation conditions. The only exception to  
813 this is for the calculation of neuronal weights using the logistic regression; in this case, to make  
814 it comparable to the estimation of neuronal weights from the fit to the behavior, we trained the  
815 decoder on the 750 and 250 ms conditions. The results for all decoders were largely unchanged  
816 if we obtained parameters from either the 750 ms condition or all conditions simultaneously and  
817 cross-validate using a leave one out procedure. However, we note that logistic regression  
818 weights are not sensitive to this choice of training data sets.

819 To determine the properties of a neural decoder capable of fitting our behavioral data we  
820 summarized the behavioral data in the two adapted conditions for the 11 animals used in **Figure**  
821 **4**. Since different orientations were sampled for each of the mice, we performed a spline fit of  
822 each psychometric function and averaged across all animals (**Figure 7 – figure supplement**  
823 **1a**). For each neuronal dataset we assumed that behavior was generated by sampling from a  
824 posterior distribution that had the form of a logistic regression, i.e.:

$$\log p(\text{detect}|n_i) = \sum_{i=0}^N a_i n_i - \log Z$$

825 where  $n_0$  is once again assumed to be 1 and  $Z$  is the normalizer. The  $a_i$ 's were then determined  
826 by minimizing the symmetrized Kullback-Leibler divergence between the average of this  
827 neurally predicted detection probability raised to some power and the behaviorally observed  
828 detection probability across stimulus and adaptation conditions. Once again, we used gradient  
829 descent to perform this optimization. These behaviorally generated weights strongly correlated  
830 with the weights discovered by applying logistic regression (correlation coefficient=0.54) and the  
831 resulting mean squared error between the neurally generated psychometric curves and the  
832 behaviorally observed ones was  $2e-4$ .

833 In order to assess the degradation in performance that results from use of a suboptimal  
834 decoder we computed percent correct in the following way. First the weights obtained from the  
835 behavioral model and logistic regression model fit to the 250 and 750 conditions were used to  
836 generate a set of decision variables for each data set and stimulus condition. A task relevant  
837 measure of percent correct was computed from these values by mimicking the statistics of the  
838 behavioral task (i.e. distractors are 8 times more common than targets and target stimulus  
839 values are uniformly distributed) for a range of potential decision criteria. The optimal decision  
840 criterion was selected by determining which provided the maximum value of percent correct.  
841 This resulted in two values for optimal percent correct, one for the behavioral weights and one

842 for the logistic regression weights for each data set. Average and standard deviations for these  
843 percent correct values were then computed across data sets.

844

#### 845 **Statistical analysis.**

846 Data were tested for normality using a Lilliefors test. While all behavioral measures and auROC  
847 estimates were normally distributed, distributions of neuronal responses were not. Thus, in the  
848 case that two distributions were compared we used a t-test in behavioral measures and  
849 auROCs, and a Wilcoxon rank sum test for neuronal responses; however, since ANOVA and  
850 post hoc Tukey HSD tests have been shown to be robust to non-normality (Driscoll, 1996),  
851 these tests were used for all data. Sample sizes were not predetermined by statistical methods,  
852 but our sample sizes of the neurons and behavior animals are similar to other studies. Data  
853 collection and analysis were not performed blind to experimental conditions, but all visual  
854 presentation conditions in either calcium imaging, extracellular recording or behavior testing are  
855 randomized. Moreover, the strength and timecourse of adaptation on neuronal responses was  
856 measured using two methods (**Figure 1**) with data collected by two experimenters.

857

#### 858 **Data and code availability.**

859 All relevant data and code will be made available via GitHub and Globus.

860

#### 861 **Acknowledgements**

862 We thank B. Gincley and J. Sims for assistance with behavioral training; K. Leonard, M. Fowler  
863 and J. Isaac for surgical assistance; Z. Xu for assistance with software development; C. Hass,  
864 G. Field, C. Hull, S. Lisberger, M. Scanziani, A. Wilson, and X. Yao, for helpful discussions and  
865 comments on the manuscript. This work was supported by an NIH Director's New Innovator

866 Award (DP2-EY025439), the Pew Biomedical Trusts, and the Alfred P. Sloan Foundation  
867 (L.L.G).

868

### 869 **Author Contributions**

870 M.J. and L.L.G. designed the experiments. M.J. collected and analyzed the electrophysiology  
871 and behavior data. L.L.G. collected and, together with J.M.B., analyzed the calcium imaging  
872 data. M.J., J.M.B., and L.L.G wrote the manuscript.

873

874

### 875 **References**

876 Alwis DS, Richards KL, Price NSC (2016) Masking reduces orientation selectivity in rat visual  
877 cortex. *J Neurophysiol* 116:2331–2341.

878 Ball K, Sekuler R (1982) A Specific and Enduring Improvement in Visual Motion Discrimination.  
879 *Science* (80- ) 218:697–698.

880 Beck JM, Ma WJ, Pitkow X, Latham PE, Pouget A (2012) Not Noisy, Just Wrong: The Role of  
881 Suboptimal Inference in Behavioral Variability. *Neuron* 74:30–39.

882 Britten K, Newsome W, Shadlen M, Celebrini S, Movshon J (1996) A relationship between  
883 behavioral choice and the visual responses of neurons in macaque MT. *Vis Neurosci*  
884 13:87–100.

885 Clifford CWG (2002) Perceptual adaptation: Motion parallels orientation. *Trends Cogn Sci*  
886 6:136–143.

887 Clifford CWG, Wyatt AM, Arnold DH, Smith ST, Wenderoth P (2001) Orthogonal adaptation  
888 improves orientation discrimination. *Vision Res* 41:151–159.

889 Deneve S, Latham PE, Pouget A (1999) Reading population codes: a neural implementation of  
890 ideal observers. *Nat Neurosci* 2:740–745.

891 Desimone R, Albright TD, Gross CG, Bruce C (1984) Stimulus-selective properties of inferior

- 892 temporal neurons in the macaque. *J Neurosci* 4:2051–2062.
- 893 Djurdjevic V, Ansuini A, Bertolini D, Macke JH, Zoccolan D (2018) Accuracy of Rats in  
894 Discriminating Visual Objects Is Explained by the Complexity of Their Perceptual Strategy.  
895 *Curr Biol* 0:1–11.
- 896 Dragoi V, Sharma J, Miller EK, Sur M (2002) Dynamics of neuronal sensitivity in visual cortex  
897 and local feature discrimination. *Nat Neurosci* 5:883–891.
- 898 Dragoi V, Sharma J, Sur M (2000) Adaptation-Induced Plasticity of Orientation Tuning in Adult  
899 Visual Cortex. *Neuron* 28:287–298.
- 900 Driscoll WC (1996) Robustness of the ANOVA and Tukey-Kramer statistical tests. *Comput Ind*  
901 *Eng* 31:265–268.
- 902 Dubner R, Zeki SM (1971) Response properties and receptive fields of cells in an anatomically  
903 defined region of the superior temporal sulcus in the monkey. *Brain Res* 35:528–532.
- 904 Fulvio JM, Green CS, Schrater PR (2014) Task-Specific Response Strategy Selection on the  
905 Basis of Recent Training Experience. *PLoS Comput Biol* 10.
- 906 Georgopoulos A, Schwartz A, Kettner R (1986) Neuronal population coding of movement  
907 direction. *Science* (80- ) 233:1416–1419.
- 908 Glickfeld LL, Histed MH, Maunsell JHR (2013) Mouse Primary Visual Cortex Is Used to Detect  
909 Both Orientation and Contrast Changes. *J Neurosci* 33:19416–19422.
- 910 Goltstein PM, Coffey EBJ, Roelfsema PR, Pennartz CM a. (2013) In Vivo Two-Photon Ca<sup>2+</sup>  
911 Imaging Reveals Selective Reward Effects on Stimulus-Specific Assemblies in Mouse  
912 Visual Cortex. *J Neurosci* 33:11540–11555.
- 913 Graf ABA, Kohn A, Jazayeri M, Movshon JA (2011) Decoding the activity of neuronal  
914 populations in macaque primary visual cortex. *Nat Neurosci* 14:239–245.
- 915 Green DM, Swets J (1966) Signal detection theory and psychophysics. Wiley.
- 916 Ho T, Brown S, van Maanen L, Forstmann BU, Wagenmakers E-J, Serences JT (2012) The  
917 Optimality of Sensory Processing during the Speed-Accuracy Tradeoff. *J Neurosci*

- 918 32:7992–8003.
- 919 Hubel DH, Wiesel TN (1959) Receptive fields of single neurones in the cat's striate cortex. *J*  
920 *Physiol* 148:574–591.
- 921 Hung CP, Kreiman G, Poggio T, DiCarlo JJ (2005) Fast Readout of Object Identity from  
922 Macaque Inferior Temporal Cortex. *Science* (80- ) 310:863–866.
- 923 Jazayeri M, Movshon JA (2006) Optimal representation of sensory information by neural  
924 populations. *Nat Neurosci* 9:690–696.
- 925 Keller AJ, Houlton R, Kampa BM, Lesica NA, Mrsic-Flogel TD, Keller GB, Helmchen F (2017)  
926 Stimulus relevance modulates contrast adaptation in visual cortex. *Elife* 6:4–15.
- 927 Kohn A (2007) Visual Adaptation: Physiology, Mechanisms, and Functional Benefits. *J*  
928 *Neurophysiol* 97:3155–3164.
- 929 Kohn A, Movshon JA (2004) Adaptation changes the direction tuning of macaque MT neurons.  
930 *Nat Neurosci* 7:764–772.
- 931 Kreile AK, Bonhoeffer T, Hübener M (2011) Altered visual experience induces instructive  
932 changes of orientation preference in mouse visual cortex. *J Neurosci* 31:13911–13920.
- 933 Law CT, Gold JI (2009) Reinforcement learning can account for associative and perceptual  
934 learning on a visual-decision task. *Nat Neurosci* 12:655–663.
- 935 Levinson E, Sekuler R (1976) Adaptation alters perceived direction of motion. *Vision Res*  
936 16:779–781.
- 937 Ma WJ, Beck JM, Latham PE, Pouget A (2006) Bayesian inference with probabilistic population  
938 codes. *Nat Neurosci* 9:1432–1438.
- 939 Macknik SL, Livingstone MS (1998) Neuronal correlates of visibility and invisibility in the primate  
940 visual system. *Nat Neurosci* 1:144–149.
- 941 Macmillan NA, Kaplan HL (1985) Detection theory analysis of group data: Estimating sensitivity  
942 from average hit and false-alarm rates. *Psychol Bull* 98:185–199.
- 943 Mardinly AR, Oldenburg IA, Pégard NC, Sridharan S, Lyall EH, Chesnov K, Brohawn SG,

- 944 Waller L, Adesnik H (2018) Precise multimodal optical control of neural ensemble activity.  
945 Nat Neurosci 21:881–893.
- 946 Müller JR, Metha AB, Krauskopf J, Lennie P (1999) Rapid adaptation in visual cortex to the  
947 structure of images. Science 285:1405–1408.
- 948 Oh H, Beck JM, Zhu P, Sommer MA, Ferrari S, Egnér T (2016) Satisficing in split-second  
949 decision making is characterized by strategic cue discounting. J Exp Psychol Learn Mem  
950 Cogn 42:1937–1956.
- 951 Ollerenshaw DR, Zheng HJV, Millard DC, Wang Q, Stanley GB (2014) The Adaptive Trade-Off  
952 between Detection and Discrimination in Cortical Representations and Behavior. Neuron  
953 81:1152–1164.
- 954 Patterson CA, Wissig SC, Kohn A (2013) Distinct Effects of Brief and Prolonged Adaptation on  
955 Orientation Tuning in Primary Visual Cortex. J Neurosci 33:532–543.
- 956 Petruno SK, Clark RE, Reinagel P (2013) Evidence that primary visual cortex is required for  
957 image, orientation, and motion discrimination by rats. PLoS One 8:e56543.
- 958 Poort J, Khan AG, Pachitariu M, Nemri A, Orsolich I, Krupic J, Bauza M, Sahani M, Keller GB,  
959 Mrsic-Flogel TD, Hofer SB (2015) Learning Enhances Sensory and Multiple Non-sensory  
960 Representations in Primary Visual Cortex. Neuron 86:1478–1490.
- 961 Pouget A, Dayan P, Zemel RS (2003) Inference and computation with population codes. Annu  
962 Rev Neurosci 26:381–410.
- 963 Ramachandran VS, Braddick O (1973) Orientation-specific learning in stereopsis. Perception  
964 2:371–376.
- 965 Raymond JE, Shapiro KL, Arnell KM (1992) Temporary suppression of visual processing in an  
966 RSVP task: An attentional blink? J Exp Psychol Hum Percept Perform 18:849–860.
- 967 Regan D, Beverley KI (1985) Postadaptation orientation discrimination. J Opt Soc Am A 2:147.
- 968 Resulaj A, Ruediger S, Olsen SR, Scanziani M (2018) First spikes in visual cortex enable  
969 perceptual discrimination. Elife 7:e34044.

- 970 Salzman CD, Britten KH, Newsome WT (1990) Cortical microstimulation influences perceptual  
971 judgements of motion direction. *Nature* 346:174–177.
- 972 Schiller P (1993) The effects of V4 and middle temporal (MT) area lesions on visual  
973 performance in the rhesus monkey. *Vis Neurosci* 10:717–746.
- 974 Schoups A, Vogels R, Qian N, Orban G (2001) Practising orientation identification improves  
975 orientation coding in V1 neurons. *Nature* 412:549–553.
- 976 Seriès P, Stocker AA, Simoncelli EP (2009) Is the homunculus “aware” of sensory adaptation?  
977 *Neural Comput* 21:3271–3304.
- 978 Stanislaw H, Todorov N (1999) Calculation of signal detection theory measures. *Behav Res*  
979 *Methods Instrum Comput* 31:137–149.
- 980 Stocker AA, Simoncelli EP (2006) Sensory adaptation within a Bayesian framework for  
981 perception. *Adv Neural Inf Process Syst* 18:1291–1298.
- 982 Stroud AC, Ledue EE, Crowder NA (2012) Orientation specificity of contrast adaptation in  
983 mouse primary visual cortex. *J Neurophysiol* 108:1381–1391.
- 984 Tiefenau A, Neubauer H, von Specht H, Heil P (2006) Correcting for false alarms in a simple  
985 reaction time task. *Brain Res* 1122:99–115.
- 986 Ulanovsky N, Las L, Nelken I (2003) Processing of low-probability sounds by cortical neurons.  
987 *Nat Neurosci* 6:391–398.
- 988 Wark B, Lundstrom BN, Fairhall A (2007) Sensory adaptation. *Curr Opin Neurobiol* 17:423–429.
- 989 Witt JK, Taylor JET, Sugovic M, Wixted JT (2015) Signal detection measures cannot distinguish  
990 perceptual biases from response biases. *Perception* 44:289–300.
- 991 Xiong Q, Znamenskiy P, Zador AM (2015) Selective corticostriatal plasticity during acquisition of  
992 an auditory discrimination task. *Nature*.
- 993 Yu Y, Hira R, Stirman JN, Yu W, Smith IT, Smith SL (2017) Mice use robust and common  
994 strategies to discriminate natural scenes. *bioRxiv*:1–36.
- 995 Zavitz E, Yu H-H, Rowe EG, Rosa MGP, Price NSC (2016) Rapid Adaptation Induces



996 Persistent Biases in Population Codes for Visual Motion. *J Neurosci* 36:4579–4590.  
997 Zhang J-Y, Zhang G-L, Xiao L-Q, Klein SA, Levi DM, Yu C (2010) Rule-Based Learning  
998 Explains Visual Perceptual Learning and Its Specificity and Transfer. *J Neurosci* 30:12323–  
999 12328.  
1000 Znamenskiy P, Zador AM (2013) Corticostriatal neurons in auditory cortex drive decisions  
1001 during auditory discrimination. *Nature* 497:482–485.

1002

### 1003 **Figure Legends**

1004

#### 1005 **Figure 1 - Layer 2/3 neurons in mouse V1 undergo strong adaptation.**

1006 (a) Schematic of in vivo two-photon calcium imaging and visual stimulus protocol. Head-  
1007 restrained mice passively view presentation of pairs of iso-oriented stimuli. ISI- inter-stimulus  
1008 interval; ITI- inter-trial interval. (b) Average fluorescence traces (dF/F) from an example neuron  
1009 to pairs of iso-oriented gratings separated by increasing ISIs (top to bottom). (c) Summary of the  
1010 average amplitude of the second stimulus normalized to the amplitude of the first stimulus for  
1011 each ISI for all cells (n = 245, 5 mice). Data were fit with a single exponential decay with  $\tau = 592$   
1012 ms. (d) Average normalized dF/F (250 ms ISI) and average dF/F in response to the first  
1013 stimulus for preferred (black) and neighboring (gray) orientations. (e) Average normalized dF/F  
1014 (250 ms ISI) for cells binned by their response to the first stimulus. (f-h) Same as a-c, for in vivo  
1015 extracellular recording (n=30 cells, 4 mice). FR-firing rate. Error bars are SEM across cells.

1016

#### 1017 **Figure 2 - Adaptation changes the orientation tuning and preference of layer 2/3 neurons** 1018 **in mouse V1.**

1019 (a) Schematic of in vivo two-photon calcium imaging and visual stimulus protocol. Head-  
1020 restrained mice passively view presentation of pairs of stimuli with varying orientations and  
1021 intervals. (b) Average dF/F from an example cell to eight different orientations (rows) without

1022 adaptation (left column: Control) or after 750 (middle column) or 250 ms (right column) recovery  
1023 from adaptation to a vertical ( $0^\circ$ ) grating. **(c)** Average orientation tuning curves for the neuron in  
1024 **b** measured in control (top, black) and after 750 (middle, dark gray) or 250 ms (bottom, light  
1025 gray) recovery from adaptation. Average responses (error bars are SEM across trials) in each  
1026 condition were fit with a von Mises function. **(d)** Summary of the average difference in  $dF/F$   
1027 (each cell normalized to its own peak response without adaptation) as a function of stimulus  
1028 distance from the adapter ( $n = 241$  cells, 12 mice) after 750 (dark gray) or 250 ms (light gray)  
1029 recovery from adaptation. Error bars are SEM across cells. **(e)** Summary of the average  
1030 normalized peak  $dF/F$  as a function of the distance of the cells' preferred orientation from the  
1031 adapter. Cells are binned by their preferred orientation (determined from the peak of the fit in  
1032 control conditions) into three groups: less than  $20^\circ$ , between  $20^\circ$  and  $70^\circ$ , and more than  $70^\circ$   
1033 from the adapter ( $n = 58, 110$  and  $73$  cells). **(f)** Summary of the average change in preferred  
1034 orientation as a function of the distance of the cells' preferred orientation from the adapter.  
1035 Positive shift indicates repulsion and negative shift indicates attraction relative to the adapter.  
1036 **(g)** Summary of the average change in orientation selective index (OSI) as a function of the  
1037 distance of the cells' preferred orientation from adapter. Positive change indicates increased  
1038 selectivity and negative change indicates decreased selectivity relative to control.

1039

1040 **Figure 3 - Feature identification models predict that adaptation improves discrimination.**

1041 **(a)** Schematic of the orientation identification model in which the orientation of each stimulus is  
1042 identified through a population code to determine its maximum likely orientation. The likelihood  
1043 is determined by scaling each neuron's basis function (see Methods) to the amplitude of its  
1044 response,  $n_i$ , to a given test stimulus and then summing across the population. The peak of this  
1045 likelihood function is the estimated orientation. **(b)** Average estimate of orientation as a function  
1046 of the difference of the test stimulus from the adapter after 750 (dark gray) or 250 (light gray) ms  
1047 recovery from adaptation ( $n = 10$  mice). Error bars are SEM across experiments. Inset- average

1048 standard deviation in estimate of orientation, normalized to control, as a function of adaptation  
1049 state. (c) Summary of the average auROC, found by estimating the presented orientation, as a  
1050 function of stimulus distance from the adapter after 750 or 250 ms recovery from adaptation. (d-  
1051 f) Same as c, for the average posterior probability (d), the independent Poisson estimator (e),  
1052 and the population vector (f).

1053

1054

1055 **Figure 4 - Adaptation decreases hit and false alarm rates on an orientation discrimination**  
1056 **task.**

1057 (a) Schematic of behavioral setup and trial progression. Head restrained mice press a lever to  
1058 initiate a trial, triggering the repeated presentation of a vertically oriented grating (100 ms) with a  
1059 randomly interleaved ISI (250 (light gray), 500 (gray) or 750 (dark gray) ms); the mouse must  
1060 release the lever within a short window following the presentation of a non-vertical grating to  
1061 receive a reward. (b) Hit rate for an example mouse in which target orientations were sorted  
1062 according to the preceding ISI. Data are fit with a Weibull function; vertical lines denote  
1063 threshold, error bars are 95% confidence intervals. (c) Summary of the threshold across ISIs.  
1064 Open circles are the average of all mice (n = 11 mice), connected gray lines are individual mice;  
1065 error bars are SEM across mice. (d) Summary of the average FA rate across mice. Inset:  
1066 schematic illustrating the window for a FA. (e) Cumulative histogram of reaction times for early  
1067 releases relative to the time of distractor stimulus onset sorted according to the preceding ISI;  
1068 same mouse as in b. Vertical lines represent react window used to calculate FA rate. (f)  
1069 Cumulative histogram of reaction times for early releases following a 750 ms interval (dark gray;  
1070 same data as in e for comparison) or a 22.5° target (dotted line; including all ISIs). Note the  
1071 similarity in the shape of the distribution. (g) Summary of the average kurtosis of the reaction  
1072 time distributions across mice for the three intervals and the 22.5° target (including all ISIs).

1073

1074 **Figure 4 – figure supplement 1 - The effect of adaptation on behavior is independent of**  
1075 **trial length.**

1076 (a) Discrimination threshold as a function of trial length (bin size: 0.5 s). Values are normalized  
1077 by the value at the first bin (center: 0.95 s). Shaded area is the SEM across 11 mice. (b) Same  
1078 as a, for FA rate. (c) Summary of the change in threshold (normalized to 250 ms ISI, gray  
1079 shades, right y-axis) and FA rate (non-normalized, green shades, left y-axis) as a function of  
1080 average trial length. Note that by definition, the trial length for a FA is shorter than a hit. Error  
1081 bars are SEM across 11 mice. (d) Same as c, but only including trials with matched length  
1082 across ISIs. Note that there is no difference in average trial length across ISIs for discrimination  
1083 threshold ( $p=0.83$ , one-way anova) and FA rate ( $p=0.24$ , one-way anova). (e) Summary of the  
1084 change in threshold, normalized to the threshold in the 250 ms condition, as a function of ISI, for  
1085 short (2-4 distractor presentations; black) or long (6-8 distractor presentations; gray) trials. (f)  
1086 Same as e, for FA rate. (g) Normalized response amplitude to repeated presentations of  
1087 distractors, as measured with Ca<sup>2+</sup> imaging. Error is SEM across cells. (h) Same as g,  
1088 measured with electrophysiology.

1089

1090 **Figure 4 – figure supplement 2 - No relationship between pupil size and outcome or ISI.**

1091 (a) Average time course of pupil radius for an example mouse normalized to the maximum  
1092 radius measured during the experiment and aligned to time of stimulus target onset for hit  
1093 (black) and miss (red) trials. Note the increase in pupil size after the target on hit trials, likely  
1094 due to reward. Shaded error is +/- SEM across trials. (b) Histogram of average pupil size (in a  
1095 250 ms window preceding the target) for each hit (black) and miss (red) trial from same mouse  
1096 as in a. P-value is from an unpaired t-test. (c) Summary of average normalized pupil radius for  
1097 each mouse (gray circles) and across mice (black circles) by outcome. Errorbars are SEM  
1098 across mice; p-value is from a paired t-test. (d) Average time course of normalized pupil radius  
1099 divided by ISI. Same mouse and conventions as in a. (e) Histogram of average pupil size for

1100 trials divided by ISI; same conventions as in **b**. **(f)** Summary of average normalized pupil radius  
1101 for each mouse (gray circles) and across mice (black circles) by ISI. Errorbars are SEM across  
1102 mice; p-value is from a one-way anova.

1103

1104 **Figure 5 - V1 is required for discriminating orientation and partially accounts for the**  
1105 **dependence of behavior on adaptation.**

1106 **(a)** Schematic of behavioral setup and trial progression. V1 inhibition was achieved via  
1107 optogenetic excitation of ChR2-expressing inhibitory interneurons using VGAT-ChR2 (n = 2)  
1108 and PV::Cre-AAV.flex.ChR2 (n = 2). **(b)** Hit rate on randomly interleaved control (black) and V1  
1109 inhibition (blue) trials, averaged across all ISIs, for an example VGAT-ChR2 mouse; same  
1110 conventions as in Figure 4b. **(c)** Same as **b**, for FA rate. **(d)** Summary of the average threshold  
1111 for control and V1 inhibition by ISI (n = 4 mice). Error bars are SEM across mice. **(e)** Summary  
1112 of change in threshold, normalized to the threshold in the 250 ms condition, for each ISI. **(f-g)**  
1113 Same as **d-e**, for FA rate.

1114

1115 **Figure 6 - Behavior is inconsistent with a general change detection strategy, but can be**  
1116 **explained by a task-specific circuit with biased weights.**

1117 **(a)** Schematic of the trial progression. For each trial, the distractor (Dist) orientation could be 15°  
1118 (orange), 0° (black) or -15° (green). The target orientations are 9° to 90° counter-clockwise from  
1119 the distractor orientation. **(b)** If the mouse adopts a general change detection strategy, the  
1120 discrimination threshold should be similar across different distractor orientations. **(c)** If the  
1121 mouse adopts a task-specific strategy that discriminating a learned quadrant of target  
1122 orientation space (positive orientations), the discrimination threshold would be lower for 15°  
1123 distractor and higher for -15° distractor when compared to 0° distractor. Inset: schematic of  
1124 biased weights across neurons tuned for positive orientations. **(d)** Hit rate for an example  
1125 mouse in which target orientations were sorted according to the distractor orientations. **(e)**

1126 Summary of the average change in the threshold (left) and FA rate (right) for each distractor  
1127 orientation relative to the 0° condition across mice. Open circles are the average of all mice (n =  
1128 6 mice), small filled circles are individual mice; error bars are SEM across mice.

1129

1130 **Figure 7 - Predicted weights are biased and positive.**

1131 (a) Summary of weights found by a fit to the behavioral data as a function of neuron orientation  
1132 preference. (b) Same as a, for weights found by a logistic regression. (c) Summary of the  
1133 average auROC as a function of stimulus distance from the adapter after 750 (dark gray) or 250  
1134 (light gray) ms recovery from adaptation, found by a weighted sum of neuronal activity (n = 10  
1135 mice). Rows: Positive weight for neurons with orientation preference greater than 30° (top) or  
1136 60° (bottom); Columns: Negative weight for neurons with orientation preferences less than 15°  
1137 (middle) or 30° (right), or no negative weights (left). Insets show weighting scheme for each  
1138 panel. Error bars are SEM across experiments. (d) Proposed perceptual choice circuits for  
1139 suboptimal (left) and optimal (right) computations. Orientation tuned neurons converge onto the  
1140 decoder with excitatory weights biased towards target-preferring neurons. We propose that mice  
1141 adopt a suboptimal computation implemented in a feed-forward excitatory circuit that lacks  
1142 lateral inhibition from distractor-preferring neurons.

1143

1144 **Figure 7 – figure supplement 1 - Logistic regression cannot account for effects of**  
1145 **adaptation on behavior.**

1146 (a) Fit (red) of the neural data to the behavioral data; hit rates are responses to targets  
1147 (orientations > 0°) and distractors (0°) after 750 (dark gray) or 250 (light gray) ms recovery from  
1148 adaptation. (b) Summary of the average auROC, found via logistic regression, as a function of  
1149 stimulus distance from the adapter (n = 10 mice).

1150

1151

## Figure 1

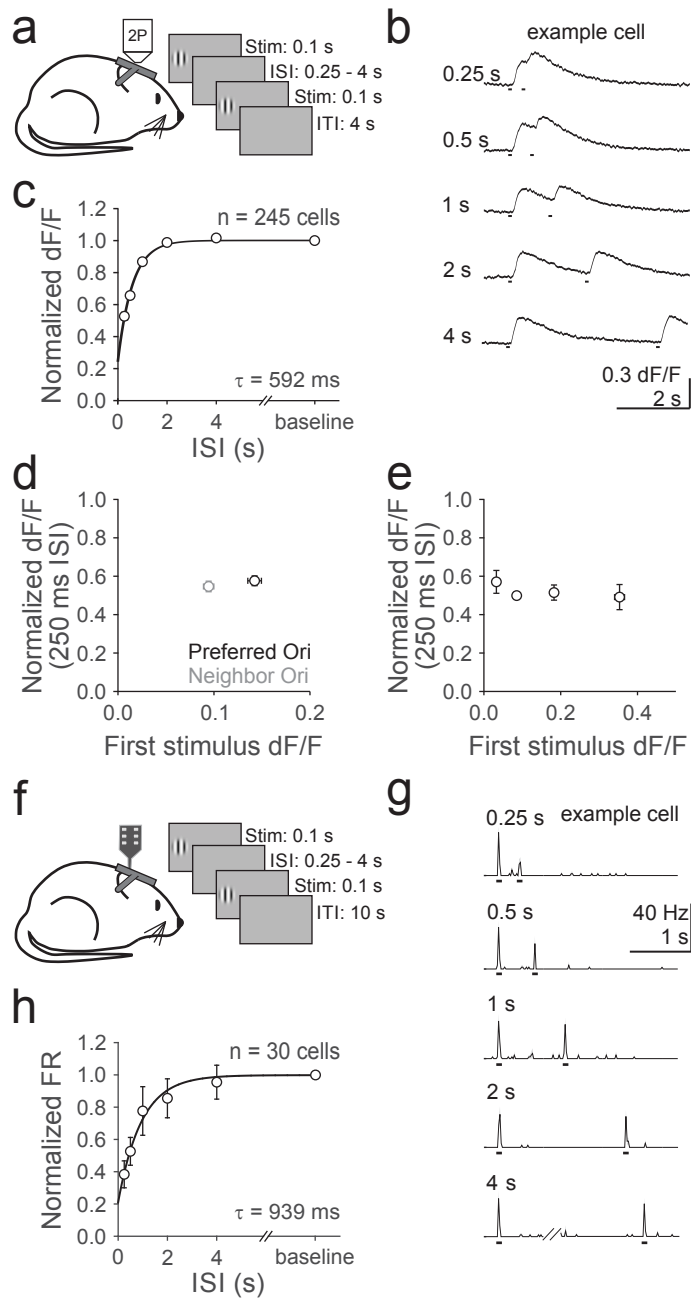

**Layer 2/3 neurons in mouse V1 undergo strong adaptation.** (a) Schematic of in vivo two-photon calcium imaging and visual stimulus protocol. Head-restrained mice passively view presentation of pairs of iso-oriented stimuli. ISI- inter-stimulus interval; ITI- inter-trial interval. (b) Average fluorescence traces (dF/F) from an example neuron to pairs of iso-oriented gratings separated by increasing ISIs (top to bottom). (c) Summary of the average amplitude of the second stimulus normalized to the amplitude of the first stimulus for each ISI for all cells ( $n = 245$ , 5 mice). Data were fit with a single exponential decay with  $\tau = 592$  ms. (d) Average normalized dF/F (250 ms ISI) and average dF/F in response to the first stimulus for preferred (black) and neighboring (gray) orientations. (e) Average normalized dF/F (250 ms ISI) for cells binned by their response to the first stimulus. (f-h) Same as a-c, for in vivo extracellular recording ( $n=30$  cells, 4 mice). FR-firing rate. Error bars are SEM across cells.

## Figure 2

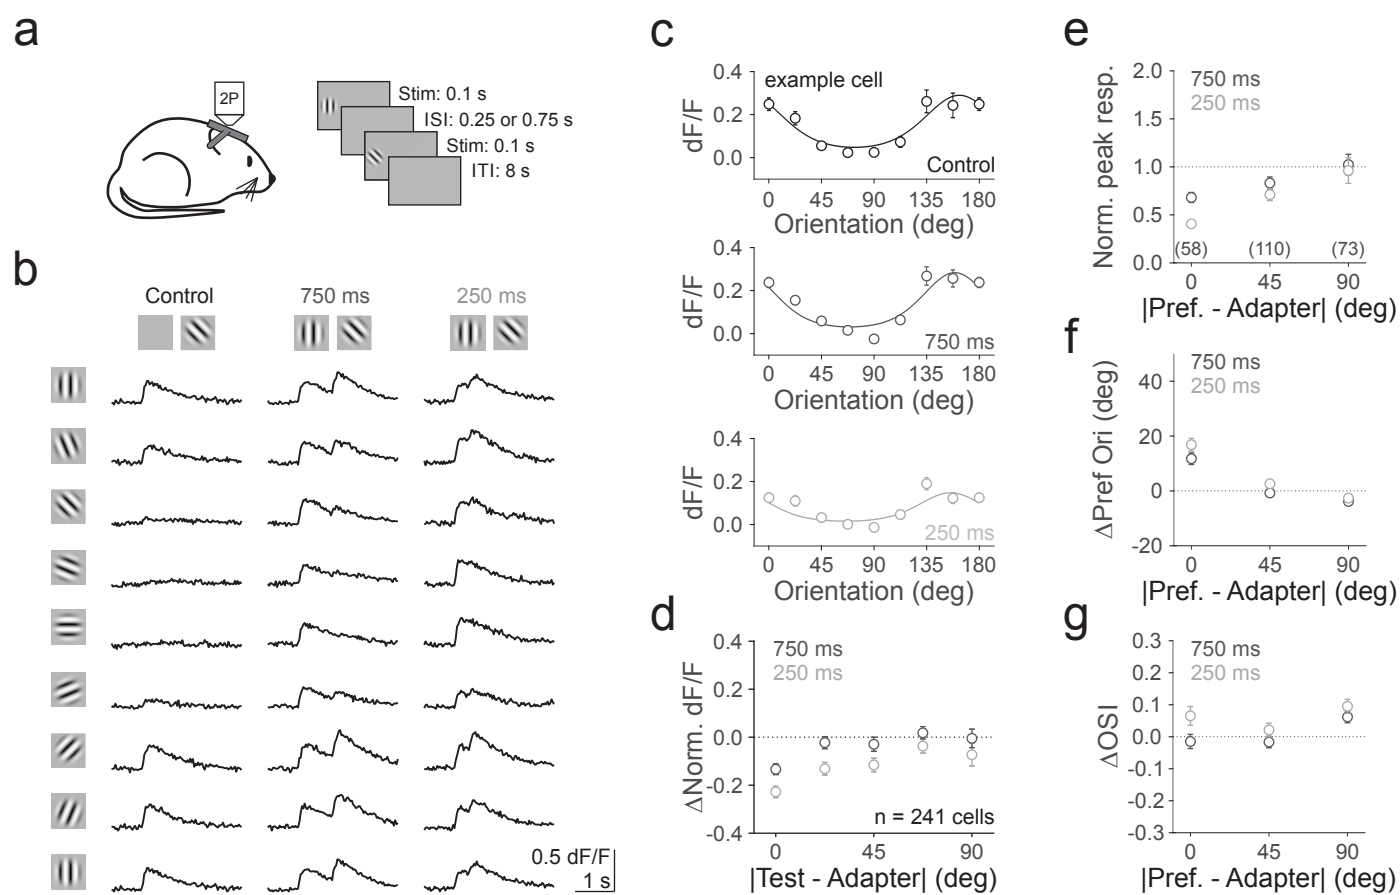

**Adaptation changes the orientation tuning and preference of layer 2/3 neurons in mouse V1.** (a) Schematic of in vivo two-photon calcium imaging and visual stimulus protocol. Head-restrained mice passively view presentation of pairs of stimuli with varying orientations and intervals. (b) Average dF/F from an example cell to eight different orientations (rows) without adaptation (left column: Control) or after 750 (middle column) or 250 ms (right column) recovery from adaptation to a vertical ( $0^\circ$ ) grating. (c) Average orientation tuning curves for the neuron in b measured in control (top, black) and after 750 (middle, dark gray) or 250 ms (bottom, light gray) recovery from adaptation. Average responses (error bars are SEM across trials) in each condition were fit with a von Mises function. (d) Summary of the average difference in dF/F (each cell normalized to its own peak response without adaptation) as a function of stimulus distance from the adapter ( $n = 241$  cells, 12 mice) after 750 (dark gray) or 250 ms (light gray) recovery from adaptation. Error bars are SEM across cells. (e) Summary of the average normalized peak dF/F as a function of the distance of the cells' preferred orientation from the adapter. Cells are binned by their preferred orientation (determined from the peak of the fit in control conditions) into three groups: less than  $20^\circ$ , between  $20^\circ$  and  $70^\circ$ , and more than  $70^\circ$  from the adapter ( $n = 58, 110$  and  $73$  cells). (f) Summary of the average change in preferred orientation as a function of the distance of the cells' preferred orientation from the adapter. Positive shift indicates repulsion and negative shift indicates attraction relative to the adapter. (g) Summary of the average change in orientation selective index (OSI) as a function of the distance of the cells' preferred orientation from adapter. Positive change indicates increased selectivity and negative change indicates decreased selectivity relative to control.



## Figure 3

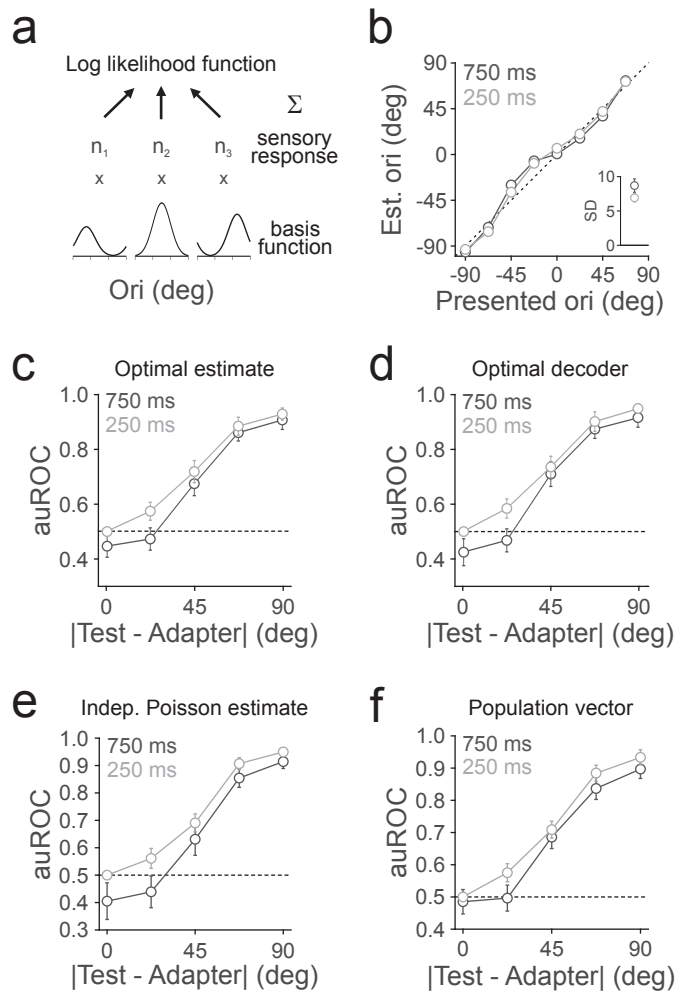

**Feature identification models predict that adaptation improves discrimination.** (a) Schematic of the orientation identification model in which the orientation of each stimulus is identified through a population code to determine its maximum likely orientation. The likelihood is determined by scaling each neuron's basis function (see Methods) to the amplitude of its response,  $n_i$ , to a given test stimulus and then summing across the population. The peak of this likelihood function is the estimated orientation. (b) Average estimate of orientation as a function of the difference of the test stimulus from the adapter after 750 (dark gray) or 250 (light gray) ms recovery from adaptation ( $n = 10$  mice). Error bars are SEM across experiments. Inset- average standard deviation in estimate of orientation as a function of adaptation state. (c) Summary of the average auROC, found by estimating the presented orientation, as a function of stimulus distance from the adapter after 750 or 250 ms recovery from adaptation. (d-f) Same as c, for the average posterior probability (d), the independent Poisson estimator (e), and the population vector (f).

## Figure 4

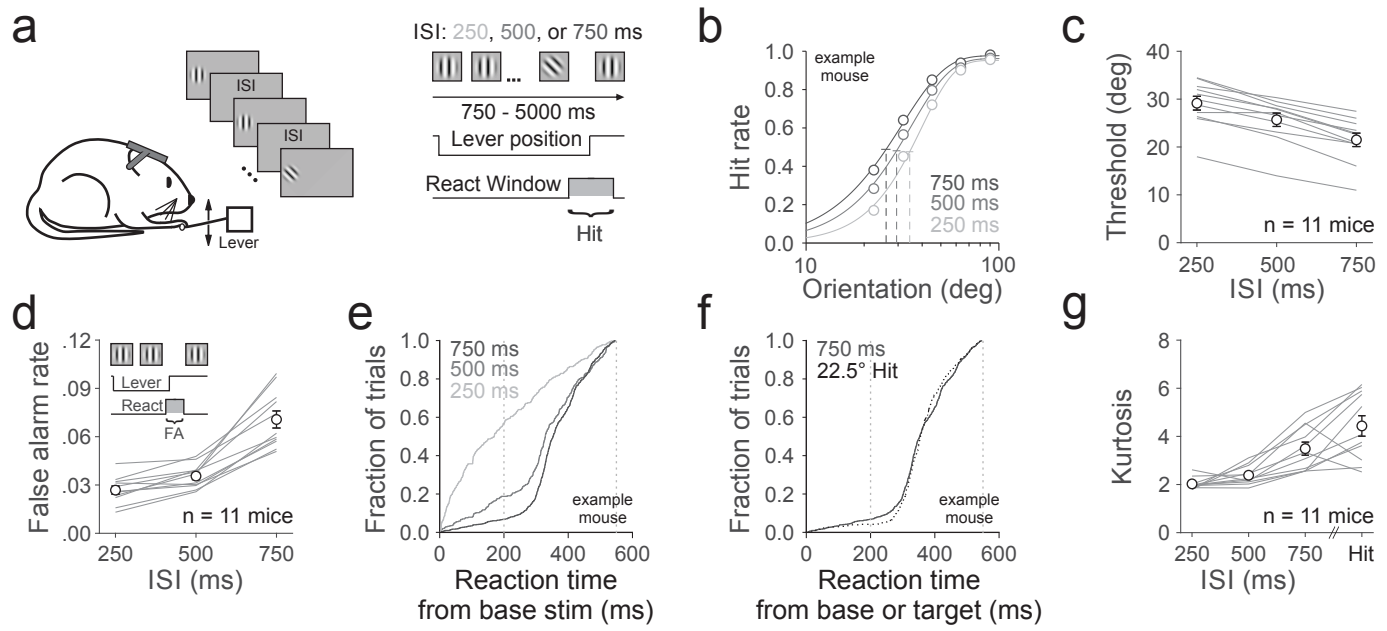

**Adaptation decreases hit and false alarm rates in an orientation discrimination task.** (a) Schematic of behavioral setup and trial progression. Head restrained mice press a lever to initiate a trial, triggering the repeated presentation of a vertically oriented grating (100 ms) with a randomly interleaved ISI (250 (light gray), 500 (gray) or 750 (dark gray) ms); the mouse must release the lever within a short window following the presentation of a non-vertical grating to receive a reward. (b) Hit rate for an example mouse in which target orientations were sorted according to the preceding ISI. Data are fit with a Weibull function; vertical lines denote threshold, error bars are 95% confidence intervals. (c) Summary of the threshold across ISIs. Open circles are the average of all mice (n = 11 mice), connected gray lines are individual mice; error bars are SEM across mice. (d) Summary of the average FA rate across mice. Inset: schematic illustrating the window for a FA. (e) Cumulative histogram of reaction times for early releases relative to the time of distractor stimulus onset sorted according to the preceding ISI; same mouse as in b. Vertical lines represent react window used to calculate FA rate. (f) Cumulative histogram of reaction times for early releases following a 750 ms interval (dark gray; same data as in e for comparison) or a 22.5° target (dotted line; including all ISIs). Note the similarity in the shape of the distribution. (g) Summary of the average kurtosis of the reaction time distributions across mice for the three intervals and the 22.5° target (including all ISIs).

## Figure 4 – figure supplement 1

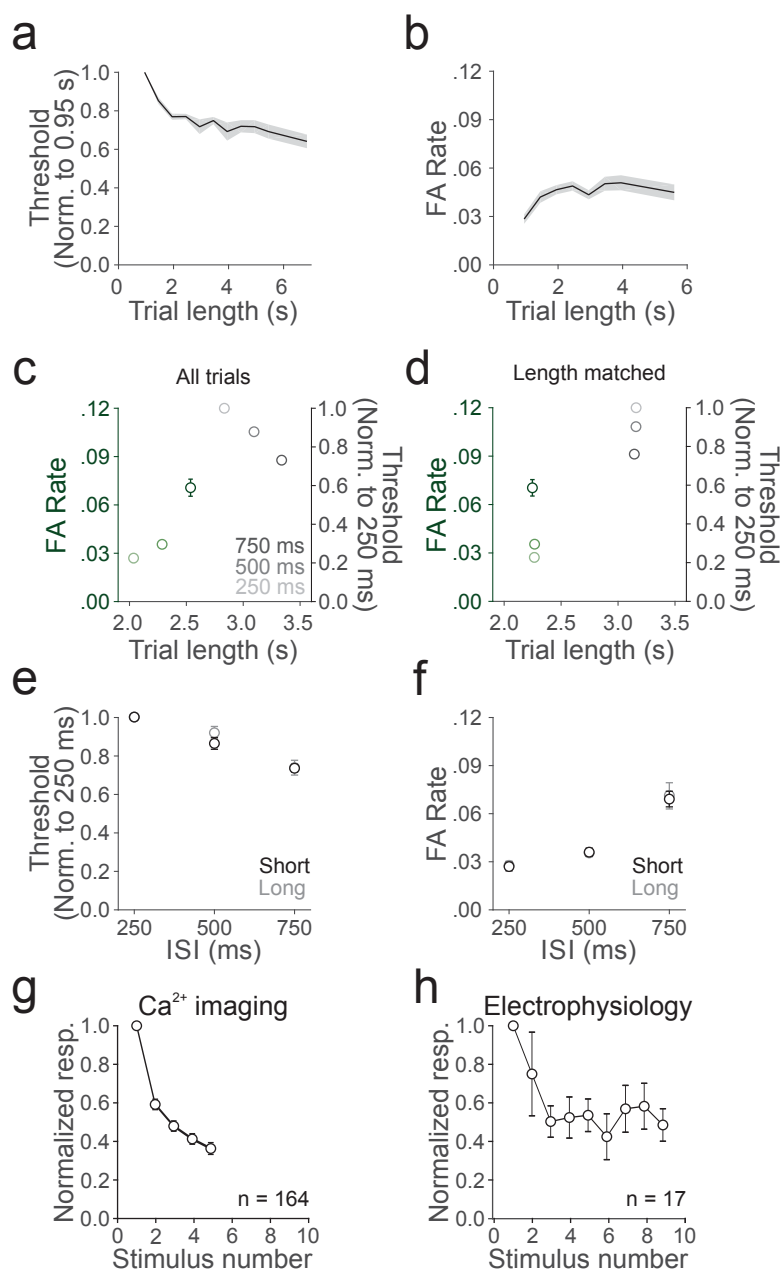

**The effect of adaptation on behavior is independent of trial length.** (a) Discrimination threshold as a function of trial length (bin size: 0.5 s). Values are normalized by the value at the first bin (center: 0.95 s). Shaded area is the SEM across 11 mice. (b) Same as a, for FA rate. (c) Summary of the change in threshold (normalized to 250 ms ISI, gray shades, right y-axis) and FA rate (non-normalized, green shades, left y-axis) as a function of average trial length. Note that by definition, the trial length for a FA is shorter than a hit. Error bars are SEM across 11 mice. (d) Same as c, but only including trials with matched length across ISIs. Note that there is no difference in average trial length across ISIs for discrimination threshold ( $p=0.83$ , one-way anova) and FA rate ( $p=0.24$ , one-way anova). (e) Summary of the change in threshold, normalized to the threshold in the 250 ms condition, as a function of ISI, for short (2-4 distractor presentations; black) or long (6-8 distractor presentations; gray) trials. (f) Same as e, for FA rate. (g) Normalized response amplitude to repeated presentations of distractors, as measured with Ca<sup>2+</sup> imaging. Error is SEM across cells. (h) Same as g, measured with electrophysiology.

## Figure 4 – figure supplement 2

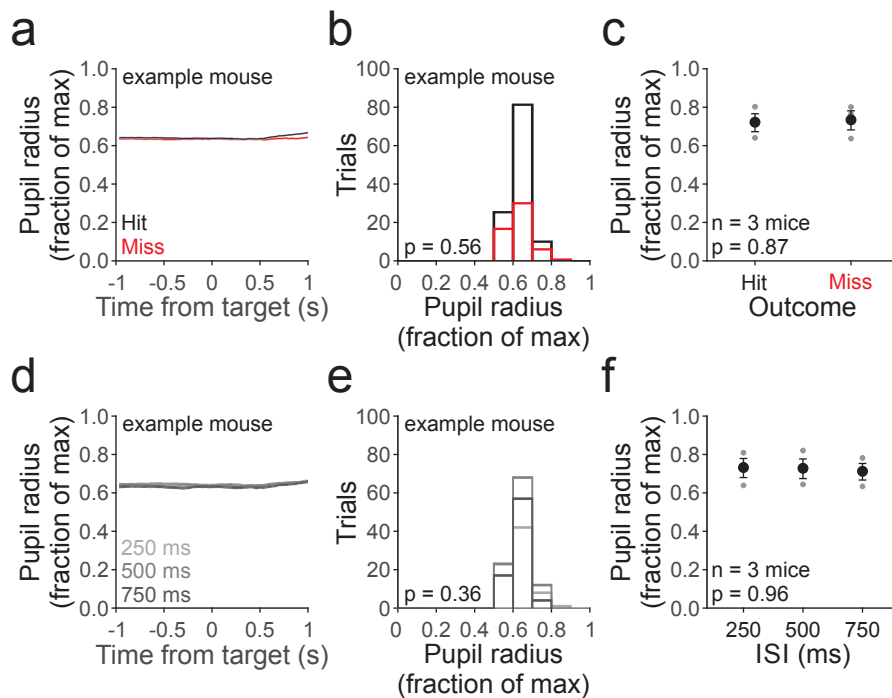

**No relationship between pupil size and outcome or ISI.** (a) Average time course of pupil radius for an example mouse normalized to the maximum radius measured during the experiment and aligned to time of stimulus target onset for hit (black) and miss (red) trials. Note the increase in pupil size after the target on hit trials, likely due to reward. Shaded error is  $\pm$  SEM across trials. (b) Histogram of average pupil size (in a 250 ms window preceding the target) for each hit (black) and miss (red) trial from same mouse as in a. P-value is from an unpaired t-test. (c) Summary of average normalized pupil radius for each mouse (gray circles) and across mice (black circles) by outcome. Errorbars are SEM across mice; p-value is from a paired t-test. (d) Average time course of normalized pupil radius divided by ISI. Same mouse and conventions as in a. (e) Histogram of average pupil size for trials divided by ISI; same conventions as in b. (f) Summary of average normalized pupil radius for each mouse (gray circles) and across mice (black circles) by ISI. Errorbars are SEM across mice; p-value is from a one-way anova.

## Figure 5

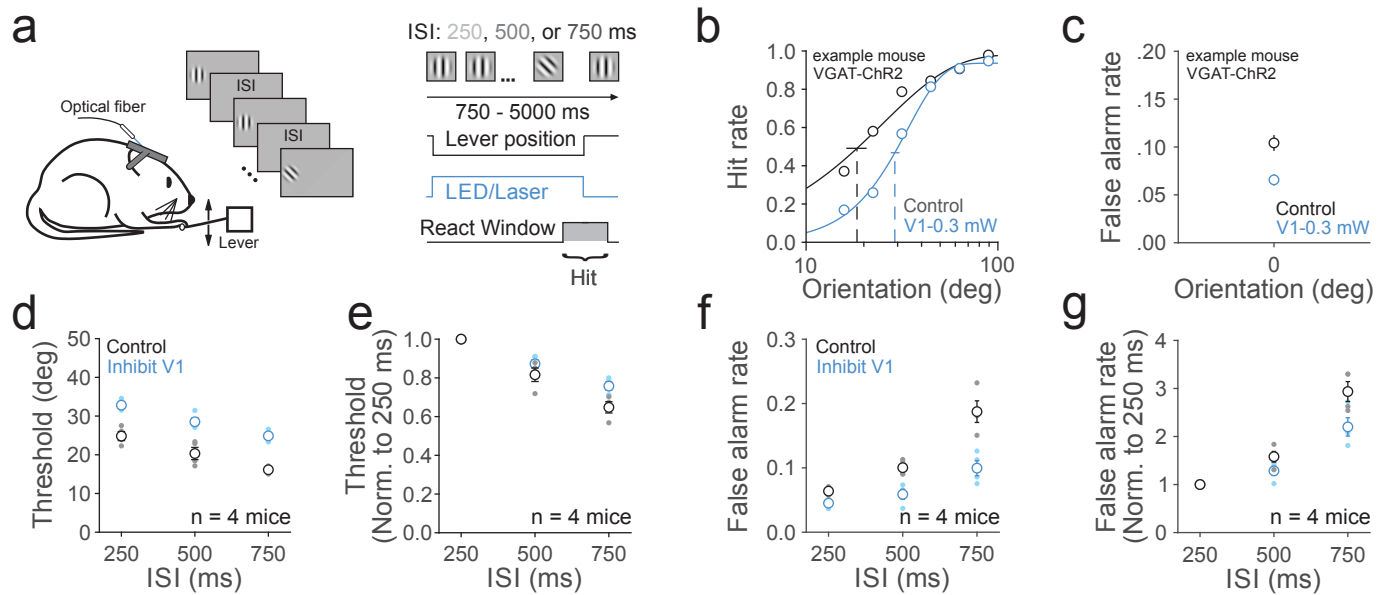

### V1 is required for discriminating orientation and partially accounts for the dependence of behavior on adaptation.

(a) Schematic of behavioral setup and trial progression. V1 inhibition was achieved via optogenetic excitation of ChR2-expressing inhibitory interneurons using VGAT-ChR2 ( $n = 2$ ) and PV::Cre-AAV.flex.ChR2 ( $n = 2$ ). (b) Hit rate on randomly interleaved control (black) and V1 inhibition (blue) trials, averaged across all ISIs, for an example VGAT-ChR2 mouse; same conventions as in **Figure 4b**. (c) Same as **b**, for FA rate. (d) Summary of the average threshold for control and V1 inhibition by ISI ( $n = 4$  mice). Error bars are SEM across mice. (e) Summary of change in threshold, normalized to the threshold in the 250 ms condition, for each ISI. (f-g) Same as **d-e**, for FA rate.

## Figure 6

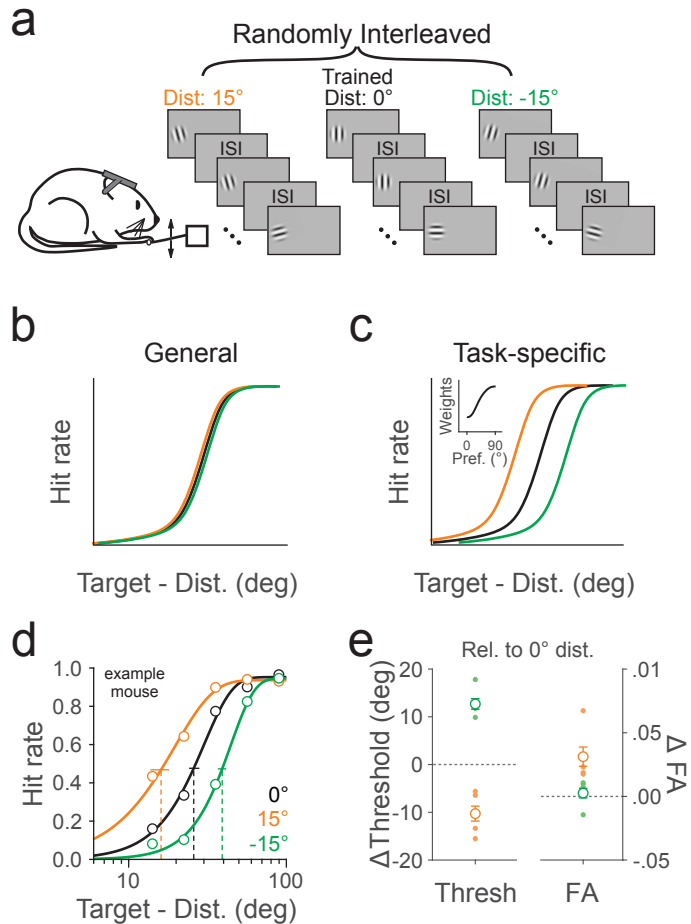

**Behavior is inconsistent with a general change detection strategy, but can be explained by a task-specific circuit with biased weights.** (a) Schematic of the trial progression. For each trial, the distractor (Dist) orientation could be 15° (orange), 0° (black) or -15° (green). The target orientations are 9° to 90° counter-clockwise change from the distractor orientation. (b) If the mouse adopts a general change detection strategy, the discrimination threshold should be similar across different distractor orientations. (c) If the mouse adopts a task-specific strategy that discriminating a learned quadrant of target orientation space (positive orientations), the discrimination threshold would be lower for 15° distractor and higher for -15° distractor when compared to 0° distractor. Inset: schematic of biased weights across neurons tuned for positive orientations. (d) Hit rate for an example mouse in which target orientations were sorted according to the distractor orientations. (e) Summary of the average change in the threshold (left) and FA rate (right) for each distractor orientation relative to the 0° condition across mice. Open circles are the average of all mice ( $n = 6$  mice), small filled circles are individual mice; error bars are SEM across mice.

## Figure 7

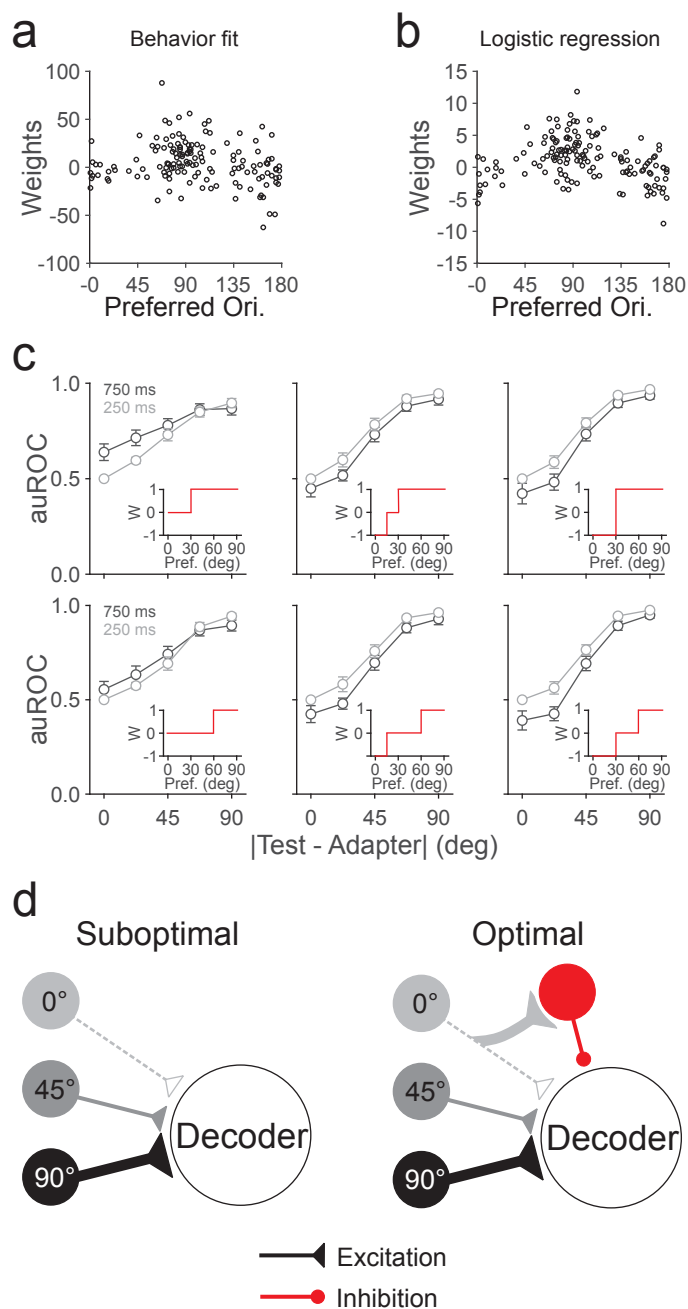

**Predicted weights are biased and positive.** (a) Summary of weights found by a fit to the behavioral data as a function of neuron orientation preference. (b) Same as a, for weights found by a logistic regression. (c) Summary of the average auROC as a function of stimulus distance from the adapter after 750 (dark gray) or 250 (light gray) ms recovery from adaptation, found by a weighted sum of neuronal activity ( $n = 10$  mice). Rows: Positive weight for neurons with orientation preference greater than  $30^\circ$  (top) or  $60^\circ$  (bottom); Columns: Negative weight for neurons with orientation preferences less than  $15^\circ$  (middle) or  $30^\circ$  (right), or no negative weights (left). Insets show weighting scheme for each panel. Error bars are SEM across experiments. (d) Proposed perceptual choice circuits for suboptimal (left) and optimal (right) computations. Orientation tuned neurons converge onto the decoder with excitatory weights biased towards target-preferring neurons. We proposed that mice adopt a suboptimal computation implemented in a feed-forward excitatory circuit that lacks lateral inhibition from distractor-preferring neurons.

## Figure 7 – figure supplement 1

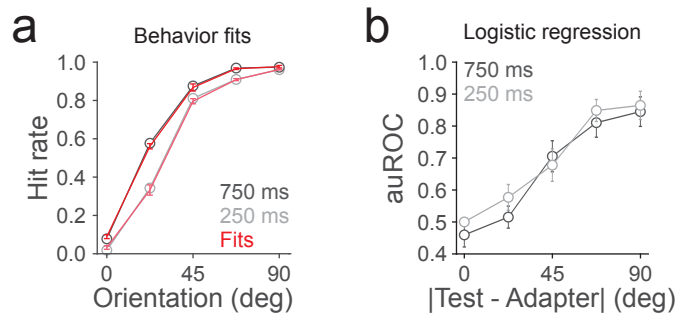

**Logistic regression cannot account for effects of adaptation on behavior.** (a) Fit (red) of the neural data to the behavioral data; hit rates are responses to targets (orientations  $> 0^\circ$ ) and distractors ( $0^\circ$ ) after 750 (dark gray) or 250 (light gray) ms recovery from adaptation. (b) Summary of the average auROC, found via logistic regression, as a function of stimulus distance from the adapter ( $n = 10$  mice).
